# Supplementary material for: Mental well-being and job satisfaction in general practitioners in Denmark and their patients’ change of general practitioner: a cohort study combining survey data and register data
Source: PubMed Central journal article supplement — BMJ Open. 2019 Nov 5;9(11):e030142. doi: 10.1136/bmjopen-2019-030142 (PMC6858117; doi:10.1136/bmjopen-2019-030142), 2019-11-05
Supplement: bmjopen-2019-030142.draft_revisions.pdf [file bmjopen-2019-030142.draft_revisions.pdf]

# BMJ Open

BMJ Open is committed to open peer review. As part of this commitment we make the peer review history of every article we publish publicly available.

When an article is published we post the peer reviewers' comments and the authors' responses online. We also post the versions of the paper that were used during peer review. These are the versions that the peer review comments apply to.

The versions of the paper that follow are the versions that were submitted during the peer review process. They are not the versions of record or the final published versions. They should not be cited or distributed as the published version of this manuscript.

BMJ Open is an open access journal and the full, final, typeset and author-corrected version of record of the manuscript is available on our site with no access controls, subscription charges or pay-per-view fees (<http://bmjopen.bmj.com>).

If you have any questions on BMJ Open's open peer review process please email [info.bmjopen@bmj.com](mailto:info.bmjopen@bmj.com)

# BMJ Open

**Poor well-being and low job satisfaction in general practitioners and patients' change of general practitioner as an indicator of dissatisfaction with care: a cohort study combining register data and survey data**

|                               |                                                                                                                                                                                                                                                                                                                                                                                                                                 |
|-------------------------------|---------------------------------------------------------------------------------------------------------------------------------------------------------------------------------------------------------------------------------------------------------------------------------------------------------------------------------------------------------------------------------------------------------------------------------|
| Journal:                      | <i>BMJ Open</i>                                                                                                                                                                                                                                                                                                                                                                                                                 |
| Manuscript ID                 | bmjopen-2019-030142                                                                                                                                                                                                                                                                                                                                                                                                             |
| Article Type:                 | Research                                                                                                                                                                                                                                                                                                                                                                                                                        |
| Date Submitted by the Author: | 01-Mar-2019                                                                                                                                                                                                                                                                                                                                                                                                                     |
| Complete List of Authors:     | Nørøxe, Karen; Research Unit for General Practice; Aarhus University, Department of Public Health<br>Vedsted, Peter; Research Unit for General Practice<br>Bro, Flemming; Research Unit for General Practice; Aarhus University, Department of Public Health<br>Carlsen, Anders; Research Unit for General Practice<br>Pedersen, Anette; Research Unit for General Practice; Aarhus University, Department of Clinical Medicine |
| Keywords:                     | Quality in health care < HEALTH SERVICES ADMINISTRATION & MANAGEMENT, General practitioners, Burnout, Job satisfaction, Patient satisfaction, Denmark                                                                                                                                                                                                                                                                           |
|                               |                                                                                                                                                                                                                                                                                                                                                                                                                                 |

SCHOLARONE™  
Manuscripts

1  
2  
3 **Poor well-being and low job satisfaction in general practitioners and patients' change of general**  
4 **practitioner as an indicator of dissatisfaction with care: a cohort study combining register data**  
5 **and survey data**  
6  
7  
8  
9  
10  
11  
12

13 Karen Busk Nørøxe<sup>1,3</sup>, Peter Vedsted<sup>1</sup>, Flemming Bro<sup>1,3</sup>, Anders Helles Carlsen<sup>1</sup>, Anette Fischer Pedersen<sup>2</sup>  
14  
15  
16

17 <sup>1</sup>Research Unit for General Practice, Aarhus, Bartholins Allé 2, 8000 Aarhus C, Denmark  
18

19 <sup>2</sup>Department of Clinical Medicine, Aarhus University, Palle Juul-Jensens Boulevard 82, 8200 Aarhus N, Denmark  
20

21 <sup>3</sup>Department of Public Health, Aarhus University, Bartholins Allé 2, 8000 Aarhus C, Denmark  
22  
23  
24  
25  
26  
27  
28  
29  
30  
31  
32  
33

34 **Corresponding author:**

35 Karen Busk Nørøxe

36 Research Unit for General Practice, Aarhus & Department of Public Health, Aarhus University, Denmark  
37

38 E-mail: karen.bn@ph.au.dk  
39

40 Phone: +45 6179 1221  
41  
42  
43

44 Word count, text: 3,393

45 Word count, abstract: 297

46 Number of tables: 3  
47  
48  
49  
50  
51  
52  
53  
54  
55  
56  
57  
58  
59  
60

## ABSTRACT

**Objectives:** Low job satisfaction and poor well-being (e.g. stress and burnout) among physicians may have negative consequences for patient experienced healthcare quality. In primary care, this could manifest in patients choosing another general practitioner (GP). The objective of this study was to examine change of GP (unrelated to change of address) among patients in relation to their GPs' job satisfaction, well-being, and self-assessed work-ability.

**Design and setting:** Data from a nationwide questionnaire survey among Danish GPs in May 2016 was combined with register data on their listed patients. Associations between patients' change of GP (COGP) in the 6-month study period (from May 2016) and the job satisfaction/well-being of their GP were estimated as risk ratios (RRs) at the individual patient level using binomial regression analysis. Potential confounders were included for adjustment.

**Participants:** The study cohort included 569,766 patients aged  $\geq 18$  years listed with 409 GPs in single-handed practices.

**Results:** COGP was significantly associated with occupational distress (burnout and low job satisfaction) in the GP. This association was seen in a dose-response like pattern. For burnout, associations were found for depersonalisation and reduced sense of personal accomplishment (but not for emotional exhaustion). The adjusted risk ratio was 1.40 (1.10-1.72) for patients listed with a GP with the lowest level of job satisfaction and 1.24 (1.01-1.52) and 1.40 (1.14-1.72) for patients listed with a GP in the most unfavourable categories of depersonalisation and sense of personal accomplishment (the most favourable categories used as reference). COGP was not associated with self-assessed work-ability or domains of well-being related to life in general.

1  
2  
3 **Conclusions:** The findings strongly suggest that low job satisfaction, depersonalisation ('cynicism') and sense  
4 of low personal accomplishment among GPs affect patients' decision to change GP. Hence, the study indicate  
5 a negative impact of these factors on medical quality.  
6  
7  
8  
9

10  
11  
12 **Keywords:** Quality in Health Care, General Practitioners, Burnout, Job Satisfaction, Patient Satisfaction,  
13  
14 Denmark  
15  
16  
17  
18  
19  
20  
21  
22  
23  
24  
25  
26  
27  
28  
29  
30  
31  
32  
33  
34  
35  
36  
37  
38  
39  
40  
41  
42  
43  
44  
45  
46  
47  
48  
49  
50  
51  
52  
53  
54  
55  
56  
57  
58  
59  
60

### Strengths and limitations of this study

- Mental well-being and job satisfaction in general practitioners (GPs) were examined in relation to a register based (rather than a self-reported) measure of healthcare quality.
- Mental well-being and job satisfaction were assessed by validated rating scales.
- Precise linkage of each patient with a specific GP.
- Prospective study design.
- Adjustment for several potential confounders, but observed associations could still be mediated by unmeasured factors.

### BACKGROUND

Among general practitioners (GPs) stress, burnout and job dissatisfaction is prevalent[1] and may have important implications for quality in healthcare.[2–7] Yet, existing research examining the possible consequences of physician mental well-being/satisfaction for healthcare quality predominantly rely on physician self-report.

Patient satisfaction is by itself an essential component of healthcare quality and may furthermore reflect underlying dimensions of healthcare quality important for health outcomes. Such dimension include access to care and effectiveness of clinical and interpersonal care.[8] The possible negative implications of GP distress for patients' experience and satisfaction with primary healthcare is understudied.

A change of GP that is unrelated to change of address (because of moving) may indicate dissatisfaction with the GP.[9–11] The continuous relationship with a GP is highly valued by many patients[12], and a patient's change of GP is often preceded by careful consideration.[13] Satisfaction and decision-making regarding change of GP is strongly influenced by the patient's perception of interpersonal aspects of care.[9,13–15] GPs who face stress, burnout, and low job satisfaction may compromise with the quality of provided care and exhibit reduced empathic concern for the patients.[7,16,17] Moreover, GPs with high levels of occupational distress may have longer waiting times for consultations due to excessive workloads, which could add to the

1  
2 listed patients' propensity to change GP.[9,10] Consequently, the patient-GP relationship and the patient-  
3 assessed quality may suffer, and some patients may decide to change GP.  
4  
5

6  
7 This study aimed to examine whether distress levels and self-assessed work-ability in GPs were associated  
8 with change of GP among listed patients (voluntary disenrollment) as proxy for dissatisfaction with care.  
9  
10  
11  
12  
13  
14  
15

## 16 **METHODS**

### 17 **Setting**

18 Almost all citizens in Denmark (98%) are listed with a specific general practice. GPs in Denmark provide  
19 comprehensive family medicine to their listed patients and act as gatekeepers and coordinators to the rest of  
20 the tax-funded healthcare system.[18] Patients are charged a fee (approx. €26) if they change general  
21 practice unrelated to change of address. Approximately, 27% of Danish GPs are organised in single-handed  
22 practices.  
23  
24  
25  
26  
27  
28  
29  
30

### 31 **Study population**

32 In May 2016, we invited all GPs in Denmark to participate in a questionnaire survey on their working  
33 conditions and mental well-being (response rate: 50.2%). The survey has been described in detail  
34 elsewhere.[1] For the purpose of this study, only GPs in single-handed practices were included as this  
35 allowed for accurate linkage of each patient to a specific GP. Furthermore, we did not include GPs who had  
36 locum(s) employed for > 20 hours per week, GPs with < 500 listed patients, and GPs who were newcomers in  
37 their current practice (i.e. arrived in 2016).  
38  
39  
40  
41  
42  
43  
44  
45  
46

47 GPs were excluded if more than 90% of the listed patients changed GP in the study period, or if more than  
48 10% of the listed patients changed GP on the same date as this indicated restructuring of the practice (N = 7).  
49  
50  
51

52 Study cases were patients aged  $\geq 18$  years who were registered in the Danish Patient List Register (PLR) with  
53 an eligible general practice at the beginning of the study period. The PLR holds information on start and end  
54 dates of all registrations of patients with all general practices in Denmark. The 6-month study period started  
55  
56  
57  
58  
59  
60

1  
2 on 1 May 2016. A total of 569,776 patients listed with 402 GPs in single-handed practices were included in  
3  
4 the analyses.  
5  
6  
7

## 8 **Change of GP**

9  
10 A *patient's change of GP (COGP)* was defined as being listed in the PLR with a start date with a general  
11  
12 practice in the study period and no new postal address or immigration within two months on both sides of  
13  
14 the start date. Information on change of address and immigration among patients was collected from the  
15  
16 Danish Civil Registration System.  
17  
18

## 19 **GP mental well-being and job satisfaction**

20  
21 The indicators of mental well-being (general and occupational) and job satisfaction were selected a priori  
22  
23 from the GP questionnaire. The indicators were measured by validated and reliable rating scales, which have  
24  
25 previously shown adequate consistency among Danish GPs.[1] *Job satisfaction* was assessed by the Warr-  
26  
27 Cook-Wall Job Satisfaction Scale (WCW-JSS), *perceived stress in general life* by Cohen's 10-item Perceived  
28  
29 Stress Scale (PSS-10), *general well-being* by the 5-item World Health Organisation Well-Being Index (WHO-5),  
30  
31 and *burnout* by the Maslach Burnout Inventory Human-Services-Survey (MBI-HSS). The MBI-HSS consists of  
32  
33 three subscales that measure three burnout dimensions: *emotional exhaustion*, *depersonalisation*, and *sense*  
34  
35 *of personal accomplishment*. *Self-rated work-ability* was measured by a single-item of the Work Ability Index  
36  
37 (WAI); the respondents scored their current work-ability against their lifetime best on a Likert scale. This  
38  
39 single item has shown high consistency with the full scale.[19]  
40  
41  
42  
43  
44

45 We categorised *job satisfaction*, *perceived stress*, *self-rated workability*, and each burnout dimension  
46  
47 according to quartiles of the scale scores. No well-established cut-off values exist that define significant  
48  
49 positive or negative levels of these measures. Burnout is often categorised according to the cut-off value  
50  
51 based on normative frequency distributions; this approach allows for comparison of burnout symptoms over  
52  
53 time and across populations, but it does not signify clinical significance.[20] As in previous research, we  
54  
55 categorised scales according to quartiles to allow for exploration of non-linear and dose-response like  
56  
57 associations with COGP.[21,22] To evaluate burnout as a multidimensional construct[20], we additionally  
58  
59  
60



1  
2 categorised burnout based on a *composite burnout score*.<sup>[22]</sup> This score was calculated by adding up points  
3  
4 corresponding to the quartile of each subscale (reversed score for personal accomplishment); 1 point was  
5  
6 assigned for subscale scores in the first quartile, and 2, 3 and 4 points were assigned for scores in the second,  
7  
8 third and fourth quartiles, respectively. The composite score was categorised into five groups: 3-4 points  
9  
10 (corresponding to low burnout levels on all subscales), 5-6 points, 7-8 points, 9-10 points, and 11-12 points  
11  
12 (corresponding to high burnout levels on all subscales). Finally, *general well-being* was categorised as 'poor'  
13  
14 for a scale score of  $\leq 50$  (the recommended cut-off value when using the WHO-5 for screening for  
15  
16 depression), 'good' for a score of  $>70$ , and 'moderate' for a score in between.<sup>[1]</sup>  
17  
18  
19  
20

### 21 **Covariates**

22  
23 Potential confounders were selected a priori for adjustment. At GP level, information on gender and seniority  
24  
25 (years since qualification as a GP:  $\leq 5$ , 6-15, 16-25, or  $\geq 25$ ) was obtained from the questionnaire survey. At  
26  
27 patient level, information on each patient's demographic and socioeconomic characteristics was obtained  
28  
29 from Statistics Denmark.<sup>[23]</sup> This information included gender, age group at the beginning of the study  
30  
31 period (18-29, 30-39, 40-49, 50-59, 60-69, 70-79, or  $\geq 80$  years), marital status (married/cohabiting or living  
32  
33 alone), ethnic origin (Dane or immigrant/descendent), degree of urbanisation (rural area:  $< 1,000$   
34  
35 inhabitants, small city: 1,000-19,999 inhabitants, medium city: 20,000-99,999 inhabitants, or large city:  $>$   
36  
37 1,000,000 inhabitants), OECD-modified household income (categorised in pentiles), highest attained  
38  
39 educational level (low:  $\leq 10$  years, medium: 11-15 years, or high:  $> 15$  years), work affiliation (*in the labour*  
40  
41 *force*: employed and students, *outside the labour force*: unemployed, early retirement pensioner, personal or  
42  
43 sick leave, or *retired*).

44  
45  
46  
47  
48 Multimorbidity in patients was assessed by Charlson's Comorbidity Index (CCI) score (0, 1, 2, or  $\geq 3$ ), which  
49  
50 was calculated on the basis of the diagnoses registered in the Danish National Patient Register in 2006-  
51  
52 2015.<sup>[24]</sup> Finally, the percentage of general practices closed for intake of new patients in the patients'  
53  
54 municipality in 2016 ( $< 60\%$ , 60-80%, or  $> 80\%$ ) was included as a covariate obtained from the Organisation  
55  
56 of General Practitioners in Denmark<sup>[25]</sup> because the patient's option to change general practice depends on  
57  
58  
59  
60

1  
2 the availability of alternative practices.[9] GPs are generally allowed to close for intake of new patients when  
3  
4 their list size exceeds 1,600 patients per GP.  
5  
6

7 Information on socioeconomic characteristics was obtained for 2015. Missing information on educational  
8  
9 level (5.9%) was categorised as unknown. Patients with missing information on any other covariates were  
10  
11 excluded (N = 5.213 (0.9%)). Each patient was linked to the GP-related data through the GP's provider  
12  
13 number.[1] At patient level, the data were linked through the CRN; a unique personal identification number  
14  
15 assigned to all citizens in Denmark.[26] All personal identifiers were encrypted prior to analysis.[1]  
16  
17  
18

## 19 **Analyses**

20  
21 We calculated the share of patients with COGP and the corresponding 95% confidence interval (CI).  
22  
23 Associations between each of the included GP well-being indicators and COGP among patients were  
24  
25 calculated at the individual patient level by use of binomial regression analyses. The most favourable  
26  
27 category of the indicator examined was used as reference. Unadjusted and adjusted analyses were carried  
28  
29 out using robust variance estimation to account for clusters of patients at practice level. Adjusted models  
30  
31 included share of practices closed for new patient uptake in the municipality, GP factors (gender and  
32  
33 seniority) and patient factors (gender, age, marital status, ethnicity, city size, income, length of education,  
34  
35 work affiliation, comorbidity) in the categories described above.  
36  
37  
38  
39

40  
41 Prior to these analyses, we tested that the mean time at risk of COGP per listed patient did not vary across  
42  
43 the GP well-being/satisfaction categories. Patients were considered to be at risk until death, immigration, or  
44  
45 change of general practice for any reason.  
46  
47

48 A p-value of  $\leq 0.05$  was considered statistically significant. Analyses were performed using Stata, version 15.  
49  
50

## 51 **Patient and public involvement**

52  
53 This research was done without patient or public involvement.  
54  
55  
56  
57

## 58 **RESULTS**

During the 6-month study period, we identified 6,648 (1.17%) cases of COGP among the included patients (i.e. change of GP without change of address). The characteristics of the study cohort (N = 569,776) and the share of patients with COGP are shown in Table 1.

**Table 1.** Patient characteristics according to COGP in the 6-month study period.

|                                                                |                          | All patients<br>N (%) | Patients with COGP<br>n per 1000 (95%CI) |
|----------------------------------------------------------------|--------------------------|-----------------------|------------------------------------------|
| <b>Total</b>                                                   |                          | 569,776 (100)         | 11.7 (11.4-11.9)                         |
| <b>Gender</b>                                                  | Female                   | 287,097 (50.4)        | 13.1 (12.7-13.6)                         |
|                                                                | Male                     | 282,679 (49.6)        | 10.2 (9.8-10.5)                          |
| <b>Age group, years</b>                                        | 18 – 29                  | 116,342 (20.4)        | 15.5 (14.8-16.2)                         |
|                                                                | 30 – 39                  | 85,453 (15.0)         | 13.7 (12.9-14.4)                         |
|                                                                | 40 – 49                  | 96,114 (16.8)         | 11.1 (10.4-11.7)                         |
|                                                                | 50 – 59                  | 94,716 (16.6)         | 9.5 (8.9-10.1)                           |
|                                                                | 60 – 69                  | 83,667 (14.7)         | 9.1 (8.5-9.8)                            |
|                                                                | 70 – 79                  | 61,533 (10.8)         | 10.1 (9.3-10.9)                          |
|                                                                | ≥ 80                     | 31,951 (5.6)          | 10.3 (9.3-10.9)                          |
| <b>Marital status</b>                                          | Married / cohabiting     | 343,049 (60.2)        | 11.5 (11.1-11.9)                         |
|                                                                | Living alone             | 226,727 (39.8)        | 11.9 (11.5-12.4)                         |
| <b>Ethnicity</b>                                               | Danish                   | 491,661 (86.3)        | 11.4 (11.1-11.8)                         |
|                                                                | Immigrant/descendant     | 78,115 (13.7)         | 13.1 (12.3-13.8)                         |
| <b>Education, years</b>                                        | ≤ 10                     | 142,070 (24.9)        | 12.5 (11.9-13.1)                         |
|                                                                | 11-15                    | 227,689 (40.0)        | 10.8 (10.4-11.3)                         |
|                                                                | > 15                     | 166,644 (29.2)        | 11.8 (11.3-12.4)                         |
|                                                                | Unknown                  | 33,373 (5.9)          | 12.9 (11.8-14.2)                         |
| <b>Work affiliation</b>                                        | In the labour force      | 356,016 (62.5)        | 11.4 (11.0-11.8)                         |
|                                                                | Outside the labour force | 85,620 (15.3)         | 15.3 (14.5-16.2)                         |
|                                                                | Retired                  | 128,140 (22.5)        | 9.9 (9.4-10.5)                           |
| <b>OECD-modified household income, pentiles</b>                | 1 <sup>st</sup> (low)    | 113,956 (20.0)        | 13.3 (12.7-14.0)                         |
|                                                                | 2 <sup>nd</sup>          | 113,955 (20.0)        | 12.8 (12.2-13.5)                         |
|                                                                | 3 <sup>rd</sup>          | 113,957 (20.0)        | 11.5 (10.9-12.1)                         |
|                                                                | 4 <sup>th</sup>          | 113,953 (20.0)        | 10.5 (9.9-11.0)                          |
|                                                                | 5 <sup>th</sup> (high)   | 113,955 (20.0)        | 10.2 (9.7-10.8)                          |
| <b>Multimorbidity index score</b>                              | 0                        | 460,769 (80.9)        | 11.7 (11.4-12.1)                         |
|                                                                | 1                        | 52,485 (9.2)          | 11.6 (10.8-12.6)                         |
|                                                                | 2                        | 31,899 (5.6)          | 11.0 (9.8-12.1)                          |
|                                                                | ≥ 3                      | 24,633 (4.3)          | 11.2 (10.0-12.6)                         |
| <b>Practices closed for patient intake in the municipality</b> | < 60%                    | 264,254 (46.4)        | 12.1 (11.7-12.6)                         |
|                                                                | 60-80%                   | 200,187 (35.1)        | 12.1 (11.6-12.6)                         |
|                                                                | > 80%                    | 105,335 (18.5)        | 9.7 (9.1-10.3)                           |
| <b>City size</b>                                               | Rural area               | 89,014 (15.6)         | 10.8 (10.1-11.5)                         |
|                                                                | Small city               | 137,286 (24.1)        | 11.7 (11.1-12.3)                         |
|                                                                | Medium city              | 88,920 (15.6)         | 11.4 (10.7-12.1)                         |
|                                                                | Large city               | 254,556 (44.7)        | 12.1 (11.4-12.5)                         |
| <b>Duration of GP-patient relationship</b>                     | < 2 years                | 139,880 (24.6)        | 17.4 (16.7-18.1)                         |
|                                                                | 2 - 8 years              | 203,640 (35.7)        | 12.1 (11.7-12.6)                         |
|                                                                | > 8 years                | 226,256 (39.7)        | 7.7 (7.4-8.1)                            |

COGP: change of general practitioner without change of address.

Table 2 displays GP characteristics and well-being.

**Table 2.** Description of the GPs included in the study (N = 402)

| <b>GP and practice characteristics</b>                       |                  |
|--------------------------------------------------------------|------------------|
| <b>Gender, n (%)</b>                                         |                  |
| Female                                                       | 178 (44.3)       |
| Male                                                         | 224 (55.7)       |
| <b>Age, years; mean (SD)</b>                                 | 56.4 (8.4)       |
| <b>Years since qualification as a GP, mean (SD)</b>          | 18.9 (9.4)       |
| <b>List size, median (IQR)</b>                               | 1693 (1544-1935) |
| <b>COGP per 1000 listed patients, median (IQR); range</b>    | 9.4 (5.9-14.7)   |
| <b>Well-being and satisfaction</b>                           |                  |
| <b>Job satisfaction score (WCW-JSS), median (IQR)</b>        | 50 (40-58)       |
| <b>Emotional exhaustion score (MBI-HSS), median (IQR)</b>    | 20 (13-28)       |
| <b>Depersonalisation score (MBI-HSS), median (IQR)</b>       | 5 (3-8)          |
| <b>Personal accomplishment score (MBI-HSS), median (IQR)</b> | 35 (31-38)       |
| <b>Composite burnout score, n (%)</b>                        |                  |
| 3-4 (low)                                                    | 75 (18.7)        |
| 5-6                                                          | 80 (19.9)        |
| 7-8                                                          | 93 (23.1)        |
| 9-10                                                         | 93 (23.1)        |
| 11-12 (high)                                                 | 61 (15.2)        |
| <b>Perceived general stress score (PSS-10), median (IQR)</b> | 12 (8-17)        |
| <b>General well-being (WHO-5)</b>                            |                  |
| Good (score >70)                                             | 121 (30.6)       |
| Moderate                                                     | 197 (49.7)       |
| Poor (score ≤ 50)                                            | 78 (19.7)        |
| <b>Self-assessed work-ability, n (%)</b>                     |                  |
| Score 10 (best)                                              | 81 (20.4)        |
| Score 9                                                      | 122 (30.8)       |
| Score 8                                                      | 111 (28.0)       |
| Score 7                                                      | 82 (20.7)        |

IQR: interquartile range. COGP: Change of general practitioner without change of address. WCW-JSS: Warr-Cook-Wall Job Satisfaction Scale. MBI-HSS: Maslach Burnout Inventory Human-Services-Survey. PSS-10: Cohens Perceived Stress Scale. WHO-5: World Health Organisation Well-Being Index.

Note: Number of GPs varies due to partial response to the questionnaire for six GPs.

Table 3 shows the results of the regression analyses.

**Table 3.** Patients' COGP in relation to GP's job satisfaction, well-being, and self-assessed work-ability

|  | RR (95% CI) | adj. RR* (95% CI) |
|--|-------------|-------------------|
|  |             |                   |

|                                            |                         |                         |
|--------------------------------------------|-------------------------|-------------------------|
| <b>Job satisfaction</b> (quartiles)        |                         |                         |
| 4 <sup>th</sup> (high)                     | 1.00                    | 1.00                    |
| 3 <sup>rd</sup>                            | 1.08 (0.87-1.33)        | 1.08 (0.88-1.32)        |
| 2 <sup>nd</sup>                            | 1.21 (0.98-1.49)        | <b>1.21 (1.01-1.48)</b> |
| 1 <sup>st</sup> (low)                      | <b>1.36 (1.08-1.71)</b> | <b>1.40 (1.10-1.72)</b> |
| <b>Emotional exhaustion</b> (quartiles)    |                         |                         |
| 1 <sup>st</sup> (low)                      | 1.00                    | 1.00                    |
| 2 <sup>nd</sup>                            | 1.00 (0.80-1.25)        | 1.05 (0.85-1.31)        |
| 3 <sup>rd</sup>                            | 0.88 (0.72-1.09)        | 0.92 (0.76-1.13)        |
| 4 <sup>th</sup> (high)                     | 1.03 (0.31-1.28)        | 1.04 (0.86-1.27)        |
| <b>Depersonalisation</b> (quartiles)       |                         |                         |
| 1 <sup>st</sup> (low)                      | 1.00                    | 1.00                    |
| 2 <sup>nd</sup>                            | 1.15 (0.94-1.42)        | 1.18 (0.98-1.44)        |
| 3 <sup>rd</sup>                            | 1.15 (0.93-1.43)        | 1.22 (0.99-1.50)        |
| 4 <sup>th</sup> (high)                     | 1.21 (0.98-1.50)        | <b>1.24 (1.01-1.52)</b> |
| <b>Personal accomplishment</b> (quartiles) |                         |                         |
| 1 <sup>st</sup> (high)                     | 1.00                    | 1.00                    |
| 2 <sup>nd</sup>                            | 1.10 (0.88-1.37)        | 1.13 (0.91-1.39)        |
| 3 <sup>rd</sup>                            | <b>1.27 (1.06-1.52)</b> | <b>1.34 (1.12-1.59)</b> |
| 4 <sup>th</sup> (low)                      | <b>1.36 (1.09-1.69)</b> | <b>1.40 (1.14-1.72)</b> |
| <b>Composite burnout score</b>             |                         |                         |
| 3-4 (low)                                  | 1.00                    | 1.00                    |
| 5-6                                        | 1.16 (0.92-1.47)        | 1.15 (0.92-1.44)        |
| 7-8                                        | <b>1.24 (1.00-1.53)</b> | <b>1.30 (1.06-1.58)</b> |
| 9-10                                       | <b>1.30 (1.05-1.61)</b> | <b>1.38 (1.12-1.71)</b> |
| 11-12 (high)                               | 1.22 (0.96-1.56)        | 1.21 (0.96-1.52)        |
| <b>Perceived stress</b> (quartiles)        |                         |                         |
| 1 <sup>st</sup> (low)                      | 1.00                    | 1.00                    |
| 2 <sup>nd</sup>                            | 1.01 (0.82-1.24)        | 1.04 (0.86-1.25)        |
| 3 <sup>rd</sup>                            | 1.13 (0.90-1.42)        | 1.17 (0.93-1.46)        |
| 4 <sup>th</sup> (high)                     | 0.99 (0.82-1.20)        | 0.96 (0.80-1.15)        |
| <b>General well-being</b>                  |                         |                         |
| Good                                       | 1.00                    | 1.00                    |
| Moderate                                   | 1.06 (0.89-1.27)        | 1.07 (0.89-1.27)        |
| Poor                                       | 1.02 (0.83-1.25)        | 1.01 (0.82-1.24)        |
| <b>Self-assessed work-ability</b>          |                         |                         |
| 4 <sup>th</sup> (high)                     | 1.00                    | 1.00                    |
| 3 <sup>rd</sup>                            | 0.94 (0.75-1.17)        | 0.98 (0.79-1.22)        |
| 2 <sup>nd</sup>                            | 1.09 (0.86-1.38)        | 1.13 (0.91-1.42)        |
| 1 <sup>st</sup> (low)                      | 0.92 (0.73-1.15)        | 0.92 (0.74-1.15)        |

COGP: change of general practitioner without change of address. RR: risk ratio.

\*adjusted for patient age, gender, socioeconomic factors, multimorbidity, city size, duration of GP-patient relationship and percentage of practices closed for patient intake in the municipality (categorised as presented in Table 1) and for GP seniority and gender.

**Bold** indicates significant results ( $p \leq 0.05$ ).

The likelihood of COGP increased with depersonalisation, diminishing sense of personal accomplishment, and decreasing job satisfaction in the GP with whom the patient was listed. The adjusted RR was 1.40 (1.10-1.72)

1  
2 for patients listed with a GP with the lowest level of job satisfaction and 1.24 (1.01-1.52) and 1.40 (1.14-1.72)  
3  
4 for patients listed with a GP in the most unfavourable categories of the burnout dimensions  
5  
6  
7 depersonalisation and sense of low personal accomplishment.  
8  
9

10 Likewise, COGP tended to increase with a higher composite burnout score, although a small decline was seen  
11  
12 at the highest level of burnout. Yet, the emotional exhaustion dimension of burnout was not associated with  
13  
14 COGP. Likewise, no associations were found for perceived stress, general well-being, or self-assessed work-  
15  
16 ability.  
17  
18  
19  
20  
21

## 22 **DISCUSSION**

### 23 **Main findings**

24  
25 Patients' likelihood of changing GP increased with decreasing job satisfaction in the GP with whom they were  
26  
27 listed. Likewise, patients listed with a GP with high levels of depersonalisation, feelings of low personal  
28  
29 accomplishment, or a high composite burnout score were more likely to change GP compared to patients  
30  
31 listed with a GP with low burnout scores. Notably, these relationships had a dose-response pattern, although  
32  
33 a small decrease was seen for the highest composite burnout level. In contrast, COGP was unrelated to  
34  
35 emotional exhaustion, perceived stress, general well-being, and self-assessed work-ability in the GP.  
36  
37  
38  
39  
40

### 41 **Strengths and limitations**

42  
43 Major strengths of this study include the large sample size and the precise linkage of each patient to an  
44  
45 individual GP by the combining of register-based data and survey data. The Danish national registers provide  
46  
47 highly valid data.[26] The survey data covered multiple distinct and yet interrelated aspects of GP well-being,  
48  
49 which was measured by validated and reliable assessment scales. The categorisation of all variables were  
50  
51 performed according to predetermined procedures. The restriction of the study period to 6 months reduced  
52  
53 the risk of fluctuations in the mental state of the GP during the study period.  
54  
55

56  
57 We used COGP as a proxy for dissatisfaction with the GP. However, patients change GP after careful  
58  
59 consideration; some may even stay with their GP even if they are dissatisfied and have a poor relationship  
60

1  
2 with their GP.[9,13,14] Hence, COGP may capture only major dissatisfaction and leave minor dissatisfaction  
3  
4 undetected. In addition, not all patients consult their GP on a regular basis, which could leave some of the  
5  
6 study cases 'unexposed' to their GP. These factors could have led us to underestimate the effect of GP  
7  
8 factors on patient experience and satisfaction.  
9

10  
11 We assessed GP well-being indicators prior to COGP and the GPs were unaware of the collection of data on  
12  
13 COGP. Still, we cannot rule out that caring for a patient population with a high propensity to change GP could  
14  
15 affect GP well-being.  
16  
17

18  
19 Furthermore, factors beyond the control of the GP may affect patients' COGP and could thus confound the  
20  
21 results if inadequately controlled for. This may include characteristics of the patients themselves. For  
22  
23 instance, complex healthcare needs in patients may relate to GP distress[27] as well as to patients'  
24  
25 propensity to change GP. As seen from Table 1, patients inclined to change GP may include both patients  
26  
27 with and without complex healthcare needs and the role of case-mix is complex and may confound the  
28  
29 results in both directions.  
30  
31

32  
33 Next, the likelihood of COGP in response to poor care may decrease with the availability of alternative  
34  
35 practices locally. A high number of practices closed for patient intake may reflect workforce shortage, which  
36  
37 may be associated with increased levels of GP workload and occupational distress.[28] Therefore, we  
38  
39 adjusted for a lack of alternative practices. The adjustment for several potential confounders minimised the  
40  
41 risk of residual confounding and we believe that unmeasured confounders are unlikely to explain study  
42  
43 findings.  
44  
45

46  
47 The study population was restricted to patients listed with GPs in single-handed practices who responded to  
48  
49 the survey. Yet, we have no reason to assume that the associations examined depended on the GPs'  
50  
51 approach to participation or on the type of practice. Thus, the study findings may be generalised to  
52  
53 partnership practices and to other countries with similar general practice settings.  
54  
55

## 56 57 **Comparison with the literature**

58  
59  
60

1  
2  
3 To our knowledge, only one previous study has explored the possible impact of physician well-  
4 being/satisfaction on healthcare quality by using change of GP among patients as a quality indicator.[29]  
5  
6 Lower levels of job satisfaction were associated with a higher propensity to change GP in patients with pain,  
7  
8 whereas no such relationship was seen in patients with depression. For both patient groups, however,  
9  
10 patients of physicians with greater job satisfaction reported greater levels of trust and confidence in their  
11  
12 physician.[29] In line with our findings, the existing body of research suggests that higher levels of job  
13  
14 satisfaction in physicians induce higher levels of patient satisfaction[30] and better patient-physician  
15  
16 relationships.[7]

17  
18  
19 For burnout, the results of a recent review and meta-analysis examining the potential implications of  
20  
21 physician burnout on patient-assessed quality were in accordance with our findings; depersonalisation and  
22  
23 low sense of personal accomplishment were both significantly associated with reduced patient-reported  
24  
25 satisfaction, whereas emotional exhaustion was not.[6] Several reviews support that physician burnout  
26  
27 may reduce the patient-assessed quality of care, but they also point to the need for further research.[2–4,6]  
28  
29

30  
31  
32 There is consistent evidence that the patient's perception of the GP-patient relationship is an important  
33  
34 determinant of patient satisfaction[31–33] and that interpersonal aspects of care strongly influence the  
35  
36 decision-making regarding COGP. Not feeling recognised by the GP, poor communication, and lack of  
37  
38 confidence and trust in the GP have been identified as important drivers in patients' decision to change  
39  
40 GP.[9,13–15].

41  
42  
43 Empirical research examining the potential impact of GP burnout and job satisfaction on interpersonal  
44  
45 aspects of care is sparse, but theoretically, it is plausible that interpersonal aspects of care mediate the  
46  
47 observed associations between occupational distress and COGP. Burnout has been described as an erosion  
48  
49 of engagement initiated by loss of internal resources as a response to chronic job-related stress.[20] A  
50  
51 suggested consequence of burnout is a hesitation to invest resources in the job as an attempt to protect  
52  
53 against further resource depletion.[16] Hence, burned out GPs may be inclined to invest less in the  
54  
55 relationship with their patients. Depersonalisation refers to the development of an emotional detachment to  
56  
57 people related to work and involves lack of compassion and a cynical attitude towards patients.  
58  
59  
60



1  
2  
3  
4  
5  
6  
7  
8  
9  
10  
11  
12  
13  
14  
15  
16  
17  
18  
19  
20  
21  
22  
23  
24  
25  
26  
27  
28  
29  
30  
31  
32  
33  
34  
35  
36  
37  
38  
39  
40  
41  
42  
43  
44  
45  
46  
47  
48  
49  
50  
51  
52  
53  
54  
55  
56  
57  
58  
59  
60

Albeit reverse causality cannot be excluded, one study found that GPs with higher levels of job satisfaction asked more psychosocial questions and showed more affective communication.[34] Other studies found that GPs with lower sense of personal accomplishment used less affective communication and were less patient-centred[35] and that patients listed with more depersonalised and emotionally exhausted GPs were less satisfied with the consultations with their GP.[36] However, other studies found no indications that burnout or job dissatisfaction impaired the quality of interpersonal care.[37–39] Some of these differences may be attributable to different burnout definitions.

Job satisfaction and burnout are distinct aspects of occupational well-being, but these two aspects are also interrelated. Thus, it may seem contradictory that emotional exhaustion was not associated with COGP, while clear associations were found for the remaining two burnout components and for job satisfaction. Different explanations may account for this. Firstly, the influence of burnout on job performance may depend on the stage of burnout.[3,40] In the initial stage, emotional exhaustion may be the only symptom and by overstretching themselves GPs may compensate for the potential negative effects of adverse work conditions on patient care.[41,42] Moreover, high conscientiousness could be a risk factor for burnout. Thus, emotionally exhausted GPs may exhibit high levels of thoroughness and attentiveness to patients' needs in clinical encounters, and hence their patients may experience excellent care.[3,38,42] In later stages of burnout, carelessness and disengagement may become more dominant. This possible mix of excellent care provision and compromised care provision in emotionally exhausted GPs may counterbalance each other in the analysis. The finding that the frequency of COGP tended to increase with the composite burnout score could supports this, as higher composite scores are likely to reflect later stages of burnout. Secondly, as for the traditional cut-off levels of burnout, our categorisation of emotional exhaustion might not be suitable for identifying the level of exhaustion that causes functional impairment. A too low cut-off value could attenuate measured relationships.[3] Lastly, personal and professional values and attitudes that predispose to depersonalisation, low sense of personal accomplishment, and dissatisfaction could influence clinical practice.[43] Hence, the observed associations might reflect underlying attributes of the GP.

1  
2 While COGP was found to be associated with work-specific aspects of well-being, no associations were found  
3  
4 for well-being measures related to life in general. This suggests that job-related factors are most essential in  
5  
6 the relationship between provider well-being and patient-assessed quality of care. Yet, the actual work  
7  
8 conditions (and not only the GPs' affective response to them) may play a causal role in this relationship. For  
9  
10 instance, GPs with higher workloads may have longer waiting times and shorter consultations, which could  
11  
12 cause some patients to change GP.[9,10]  
13  
14

15  
16 COGP among patients was not associated with the self-reported work-ability among GPs. Objective versus  
17  
18 self-reported measurement of quality is controversial in research on the potential consequences of provider  
19  
20 well-being for healthcare quality; the association with self-reported quality of care is well-documented, yet  
21  
22 the reliability in terms of actual quality of care remains uncertain.[3] Quality of care is multifaceted and the  
23  
24 absence of association in our study should not be considered a proof that self-assessed work-ability is an  
25  
26 unreliable measure of care quality. Previously, we found lower self-reported work-ability as well as poor  
27  
28 well-being in GPs to be associated with a higher rate of potentially preventable hospitalisations in listed  
29  
30 patients, which could indicate suboptimal primary healthcare provision.[22] In the assessment of work-  
31  
32 ability, GPs may attach much importance to more bio-medical aspects of care, such as the ability to diagnose  
33  
34 and provide treatment according to the best medical standards. Most patients may not be qualified to judge  
35  
36 such aspects and tend to focus more on the interpersonal aspects of care in their overall assessment of  
37  
38 quality.[44]  
39  
40  
41  
42  
43

#### 44 **Implications**

45  
46 The study findings imply that GPs' occupational well-being and job satisfaction influence patient satisfaction  
47  
48 measured as COGP. Hence, improving job satisfaction and engagement and combating burnout seems  
49  
50 important to improve patient-assessed quality of care.  
51

52  
53 The possible implications are highly important: GP distress is prevalent, and COGP among patients may  
54  
55 reflect serious aspects of care quality. This lend support for the conception that attention should be paid to  
56  
57 the work conditions and the well-being of healthcare providers in the pursuit of optimal healthcare.  
58  
59  
60

1  
2  
3 However, more research is needed to establish the connection between GP well-being and healthcare  
4  
5 provision.  
6  
7  
8  
9

## 10 **Conclusion**

11  
12 We found that patients' likelihood of changing practice increased with decreasing GP engagement and job  
13  
14 satisfaction. We found no association between COGP among patients and emotional exhaustion in the GP,  
15  
16 whereas depersonalisation and reduced sense of personal accomplishment both increased the likelihood of  
17  
18 COGP. Overall, the findings suggest that the degree to which the GP thrives in the job influences the quality  
19  
20 of care provided.  
21  
22  
23  
24

## 25 **DECLARATIONS**

### 26 27 28 29 **Authors' contributions**

30  
31  
32 All authors contributed substantially to the design of the study. KBN performed the statistical analyses in  
33  
34 consultation with AHC. KBN wrote the first draft of the article. AFP, FB, PV, and AHC assisted in writing and  
35  
36 revising the manuscript. All authors read and approved the final manuscript.  
37  
38  
39  
40

### 41 **Funding**

42  
43 This work was supported by the Danish National Research Foundation for Primary Care and by the Health  
44  
45 Foundation. The funding bodies had no role in the conduction of the study or in the writing of the  
46  
47 manuscript.  
48  
49  
50  
51

### 52 **Competing interests**

53  
54 The authors declare that they have no competing interests.  
55  
56  
57  
58

### 59 **Ethics approval**

1  
2 The project was approved by the Danish Data Protection Agency (J.no. 2016–41-4648). According to Danish  
3  
4 law, approval by the Danish National Committee on Health Research Ethics was not required as no  
5  
6 biomedical intervention was performed. Respondents gave their consent to participate by responding to the  
7  
8 questionnaire. Personally identifiable information on GPs and patients were re-coded and anonymised at  
9  
10 Statistics Denmark prior to data analysis.  
11  
12  
13  
14  
15

### 16 **Availability of data and materials**

17  
18 Danish data protection regulations prohibit disclosure of data to any third party without prior permission  
19  
20 from the Danish Data Protection Agency. Thus, the data from this study cannot be made publicly available.  
21  
22  
23  
24  
25  
26  
27  
28  
29  
30  
31  
32  
33  
34  
35  
36  
37  
38  
39  
40  
41  
42  
43  
44  
45  
46  
47  
48  
49  
50  
51  
52  
53  
54  
55  
56  
57  
58  
59  
60

**REFERENCES**

1. Nørøxe KB, Pedersen AF, Bro F, Vedsted P. Mental well-being and job satisfaction among general practitioners: a nationwide cross-sectional survey in Denmark. *BMC Family Practice*. 2018;19(1)1.
2. West CP, Dyrbye LN, Shanafelt TD. Physician burnout: contributors, consequences and solutions. *J Intern. Med*. 2018;283:516-529.
3. Rathert C, Williams ES, Linhart H. Evidence for the quadruple aim. *Med Care*. 2018;56:976–84.
4. Dewa CS, Loong D, Bonato S, Trojanowski L, Rea M. The relationship between resident burnout and safety-related and acceptability-related quality of healthcare: A systematic literature review. *BMC Med Educ*. 2017;17(1):195.
5. Hall LH, Johnson J, Watt I, Tsipa A, Connor DBO. Healthcare staff wellbeing, burnout, and patient safety: A systematic review. *PLoS One*. 2016;11(7).
6. Panagioti M, Geraghty K, Johnson J, Zhou A, Panagopoulou E, Chew-Graham C, et al. Association between physician burnout and patient safety, professionalism, and patient satisfaction: A systematic review and meta-analysis. *JAMA Intern Med*. 2018;178:1317–30.
7. Williams ES, Skinner AC. Outcomes of physician job satisfaction: a narrative review, implications, and directions for future research. *Health Care Manage Rev*. 2015;28:119–39.
8. Campbell SM, Roland MO, Buetow SA. Defining quality of care. *Soc Sci Med*. 2000;51(11):1611-25.
9. Nagraj S, Abel G, Paddison C, Payne R, Elliott M, Campbell J, Roland M. Changing practice as a quality indicator for primary care: Analysis of data on voluntary disenrollment from the English GP Patient Survey. *BMC Fam Pract*. 2013;14:89.
10. Gandhi IG, Parle JV, Greenfield SM, Gould S. A quality investigation into why patients change their GPs. *Fam Pract*. 1997;14(1):49-57.
11. Grooss K, Hjertholm P, Carlsen AH, Vedsted P. Patients with cancer and change of general practice: A Danish population-based cohort study. *Br J Gen Pract*. 2016;66:e491–8.
12. Salisbury C, Sampson F, Ridd M, Montgomery AA. How should continuity of care in primary health care be assessed? *Br J Gen Pract*. 2009;59:276–82.
13. Frederiksen HB, Kragstrup J, Dehlholm-Lambertsen B. Attachment in the doctor-patient relationship in general practice: A qualitative study. *Scand. J Prim Health Care*. 2010;28:185–90.
14. Frederiksen HB, Kragstrup J, Dehlholm-Lambertsen G. It's all about recognition! Qualitative study of the value of interpersonal continuity in general practice. *BMC Fam Pract*. 2009;10:1–8.
15. Federman AD, Cook EF, Phillips RS, Puopola AL, Haas JS, Brennan TA, et al. Intention to discontinue care among primary care patients: Influence of physician behavior and process of care. *J Gen Intern Med*. 2001;16:668–74.

16. Halbesleben JRB, Rathert C. Linking physician burnout and patient outcomes. *Health Care Manage Rev.* 2008;33:29–39.
17. Maslach C, Wilmar BS, Leiter MP. Job burnout. *Annu Rev Psychol.* 2001;52:397-422.
18. Pedersen KM, Andersen JS, Sondergaard J. General Practice and Primary Health Care in Denmark. *J Am Board Fam Med.* 2012;25:34–8.
19. Ahlstrom L, Grimby-Ekman A, Hagberg M, Dellve L. The work ability index and single-item question: Associations with sick leave, symptoms, and health - A prospective study of women on long-term sick leave. *Scand J Work Environ Heal.* 2010;36:404–12.
20. Schaufeli WB, Leiter MP, Maslach C, Michael PL, Christina M. Burnout: 35 years of research and practice. *Career Dev Int.* 2009;14:204–20.
21. Pedersen AF, Sørensen JK, Bruun NH, Christensen B, Vedsted P. Risky alcohol use in Danish physicians: Associated with alexithymia and burnout? *Drug Alcohol Depend. Elsevier Ireland Ltd;* 2016;160:119–26.
22. Nørøxe KB., Pedersen AF, Carlsen AH, Bro F, Vedsted P. Increased rate of potentially preventable hospital admissions among patients listed with general practitioners with poor mental well-being, job satisfaction and self-rated work-ability. 2019.
23. Statistics Denmark. <https://www.dst.dk/en/Statistik/dokumentation>. Accessed 20 Aug 2018.
24. Thygesen SK, Christiansen CF, Christensen S, Lash TL, Sørensen HT. The predictive value of ICD-10 diagnostic coding used to assess Charlson comorbidity index conditions in the population-based Danish National Registry of Patients. *BMC Med Res Methodol.* 2011;11:83.
25. PLO analyse. Praksis med lukket for tilgang [Practices closed for intake of patients], 2016. Available from: [https://www.laeger.dk/sites/default/files/plo\\_analyse\\_praksis\\_lukket\\_med\\_tilgang.pdf](https://www.laeger.dk/sites/default/files/plo_analyse_praksis_lukket_med_tilgang.pdf). Accessed 20 Aug 2018.
26. Pedersen CB. The Danish civil registration system. *Scand J Public Health* 2011;39(7):22-5.
27. Pedersen AF, Vedsted P. Understanding the inverse care law: a register and survey-based study of patient deprivation and burnout in general practice. *Int J Equity Health.* 2014;13:121.
28. Marchand C, Peckham S. Addressing the crisis of GP recruitment and retention: A systematic review. *Br J Gen Pract.* 2017;67(657).
29. Grembowski D, Paschane D, Diehr P, Katon W, Martin D, Patrick DL. Managed care, physician job satisfaction, and the quality of primary care. *J Gen Intern Med.* 2005;20:271–7.
30. Scheepers RA, Boerebach BCM, Arah OA, Heineman MJ, Lombarts KMJM. A systematic review of the impact of physicians' occupational well-being on the quality of patient care. *Int J Behav Med.* 2015;22:683–98.
31. Vedsted P, Heje HN. Association between patients' recommendation of their GP and their evaluation of the GP. *Scand J Prim Health Care.* 2008;26:228–34.

1  
2  
3  
4  
5  
6  
7  
8  
9  
10  
11  
12  
13  
14  
15  
16  
17  
18  
19  
20  
21  
22  
23  
24  
25  
26  
27  
28  
29  
30  
31  
32  
33  
34  
35  
36  
37  
38  
39  
40  
41  
42  
43  
44  
45  
46  
47  
48  
49  
50  
51  
52  
53  
54  
55  
56  
57  
58  
59  
60

32. Wensing M, Jung HP, Mainz J, Olesen F, Grol R. A systematic review of the literature on patient priorities for general practice care. Part 1: Description of the research domain. *Soc Sci Med*. 1998;47(10):1573-88.
33. Crow R, Gage H, Hampson S, Hart J, Kimber A, Storey L, Thomas H. The measurement of satisfaction with healthcare: implications for practice from a systematic review of the literature. *Health Techn Ass*. 2002;6(32).
34. Bensing JM, Brink-Muinen A van den, Boerma W, Dulmen S van. The manifestation of job satisfaction in doctor-patient communication; a ten-country European study. *Int J Pers Cent Med*. 2013;3:44-52.
35. Zantinge EM, Verhaak PFM, De Bakker DH, Van Der Meer K, Bensing JM. Does burnout among doctors affect their involvement in patients' mental health problems? A study of videotaped consultations. *BMC Fam Pract*. 2009;10:1-10.
36. Anagnostopoulos F, Liolios E, Persefonis G, Slater J, Kafetsios K, Niakas D. Physician burnout and patient satisfaction with consultation in primary health care settings: Evidence of relationships from a one-with-many design. *J Clin Psychol Med Settings*. 2012;19:401-10.
37. Orton P, Orton C, Gray DP. Depersonalised doctors: A cross-sectional study of 564 doctors, 760 consultations and 1876 patient reports in UK general practice. *BMJ Open*. 2012;2:1-8.
38. Ožvačić Adžić Z, Katić M, Kern J, Soler JK, Cerovečki V, Polašek O. Is Burnout in Family Physicians in Croatia Related to Interpersonal Quality of Care? *Arch Ind Hyg Toxicol*. 2013;64:255-64.
39. Ratanawongsa N, Roter D, Beach MC, Laird SL, Larson SM, Carson KA, et al. Physician burnout and patient-physician communication during primary care encounters. *J Gen Intern Med*. 2008;23:1581-8.
40. Pedersen AF, Carlsen AH, Vedsted P. Association of GPs' risk attitudes, level of empathy, and burnout status with PSA testing in primary care. *Br J Gen Pract*. 2015;65:e845-51.
41. Linzer M, Manwell LB, Williams ES, Bobula JA, Brown RL, Varkey AB, Man B, McMurray JE, Maquire A, Horner-Ibler B, Schwarz MD. Working conditions in primary care: Physician reactions and care quality. *Ann Intern Med*. 2009;151(1):28-36.
42. Maslach C, Leiter MP, Schaufeli W. Measuring Burnout. *Oxford Handb Organ Well Being*. 2009;86-108.
43. Bakker AB, Demerouti E, Sanz-Vergel AI. Burnout and work engagement: The JD-R Approach. *Annu Rev Organ Psychol Organ Behav*. 2014;1:389-411.
44. Rao M, Clarke A, Sanderson C, Hammersley R. Patients' own assessments of quality of primary care compared with objective records based measures of technical quality of care: Cross sectional study. *Br Med J* 2006;333:19-22.

**STROBE 2007 (v4) Statement—Checklist of items that should be included in reports of *cohort studies***

| Section/Topic                | Item # | Recommendation                                                                                                                                                                       | Reported on page # |
|------------------------------|--------|--------------------------------------------------------------------------------------------------------------------------------------------------------------------------------------|--------------------|
| <b>Title and abstract</b>    | 1      | (a) Indicate the study's design with a commonly used term in the title or the abstract                                                                                               | 1                  |
|                              |        | (b) Provide in the abstract an informative and balanced summary of what was done and what was found                                                                                  | 2-3                |
| <b>Introduction</b>          |        |                                                                                                                                                                                      |                    |
| Background/rationale         | 2      | Explain the scientific background and rationale for the investigation being reported                                                                                                 | 4                  |
| Objectives                   | 3      | State specific objectives, including any prespecified hypotheses                                                                                                                     | 4                  |
| <b>Methods</b>               |        |                                                                                                                                                                                      |                    |
| Study design                 | 4      | Present key elements of study design early in the paper                                                                                                                              | 5-6                |
| Setting                      | 5      | Describe the setting, locations, and relevant dates, including periods of recruitment, exposure, follow-up, and data collection                                                      | 5                  |
| Participants                 | 6      | (a) Give the eligibility criteria, and the sources and methods of selection of participants. Describe methods of follow-up                                                           | 5, 7               |
|                              |        | (b) For matched studies, give matching criteria and number of exposed and unexposed                                                                                                  | -                  |
| Variables                    | 7      | Clearly define all outcomes, exposures, predictors, potential confounders, and effect modifiers. Give diagnostic criteria, if applicable                                             | 5-8                |
| Data sources/<br>measurement | 8*     | For each variable of interest, give sources of data and details of methods of assessment (measurement). Describe comparability of assessment methods if there is more than one group | 5-8                |
| Bias                         | 9      | Describe any efforts to address potential sources of bias                                                                                                                            | 5-8                |
| Study size                   | 10     | Explain how the study size was arrived at                                                                                                                                            | 5                  |
| Quantitative variables       | 11     | Explain how quantitative variables were handled in the analyses. If applicable, describe which groupings were chosen and why                                                         | 6-7                |
| Statistical methods          | 12     | (a) Describe all statistical methods, including those used to control for confounding                                                                                                | 8                  |
|                              |        | (b) Describe any methods used to examine subgroups and interactions                                                                                                                  | 8                  |
|                              |        | (c) Explain how missing data were addressed                                                                                                                                          | 7                  |
|                              |        | (d) If applicable, explain how loss to follow-up was addressed                                                                                                                       | -                  |
|                              |        | (e) Describe any sensitivity analyses                                                                                                                                                | -                  |
| <b>Results</b>               |        |                                                                                                                                                                                      |                    |



|                          |     |                                                                                                                                                                                                              |                 |
|--------------------------|-----|--------------------------------------------------------------------------------------------------------------------------------------------------------------------------------------------------------------|-----------------|
| Participants             | 13* | (a) Report numbers of individuals at each stage of study—eg numbers potentially eligible, examined for eligibility, confirmed eligible, included in the study, completing follow-up, and analysed            | 5               |
|                          |     | (b) Give reasons for non-participation at each stage                                                                                                                                                         | 5-8             |
|                          |     | (c) Consider use of a flow diagram                                                                                                                                                                           | -               |
| Descriptive data         | 14* | (a) Give characteristics of study participants (eg demographic, clinical, social) and information on exposures and potential confounders                                                                     | 8-9             |
|                          |     | (b) Indicate number of participants with missing data for each variable of interest                                                                                                                          | 7-8             |
|                          |     | (c) Summarise follow-up time (eg, average and total amount)                                                                                                                                                  | 8               |
| Outcome data             | 15* | Report numbers of outcome events or summary measures over time                                                                                                                                               | 8               |
| Main results             | 16  | (a) Give unadjusted estimates and, if applicable, confounder-adjusted estimates and their precision (eg, 95% confidence interval). Make clear which confounders were adjusted for and why they were included | 10-11 (table 3) |
|                          |     | (b) Report category boundaries when continuous variables were categorized                                                                                                                                    | 10 (table 2)    |
|                          |     | (c) If relevant, consider translating estimates of relative risk into absolute risk for a meaningful time period                                                                                             | considered      |
| Other analyses           | 17  | Report other analyses done—eg analyses of subgroups and interactions, and sensitivity analyses                                                                                                               | -               |
| <b>Discussion</b>        |     |                                                                                                                                                                                                              |                 |
| Key results              | 18  | Summarise key results with reference to study objectives                                                                                                                                                     | 12              |
| <b>Limitations</b>       |     |                                                                                                                                                                                                              |                 |
| Interpretation           | 20  | Give a cautious overall interpretation of results considering objectives, limitations, multiplicity of analyses, results from similar studies, and other relevant evidence                                   | 12-16           |
| Generalisability         | 21  | Discuss the generalisability (external validity) of the study results                                                                                                                                        | 16              |
| <b>Other information</b> |     |                                                                                                                                                                                                              |                 |
| Funding                  | 22  | Give the source of funding and the role of the funders for the present study and, if applicable, for the original study on which the present article is based                                                | 17              |

\*Give information separately for cases and controls in case-control studies and, if applicable, for exposed and unexposed groups in cohort and cross-sectional studies.

**Note:** An Explanation and Elaboration article discusses each checklist item and gives methodological background and published examples of transparent reporting. The STROBE checklist is best used in conjunction with this article (freely available on the Web sites of PLoS Medicine at <http://www.plosmedicine.org/>, Annals of Internal Medicine at <http://www.annals.org/>, and Epidemiology at <http://www.epidem.com/>). Information on the STROBE Initiative is available at [www.strobe-statement.org](http://www.strobe-statement.org).

# BMJ Open

**Poor well-being and low job satisfaction in general practitioners and patients' change of general practitioner as an indicator of dissatisfaction with care: a Danish cohort study combining register data and survey data**

|                                 |                                                                                                                                                                                                                                                                                                                                                                                                                                 |
|---------------------------------|---------------------------------------------------------------------------------------------------------------------------------------------------------------------------------------------------------------------------------------------------------------------------------------------------------------------------------------------------------------------------------------------------------------------------------|
| Journal:                        | <i>BMJ Open</i>                                                                                                                                                                                                                                                                                                                                                                                                                 |
| Manuscript ID                   | bmjopen-2019-030142.R1                                                                                                                                                                                                                                                                                                                                                                                                          |
| Article Type:                   | Original research                                                                                                                                                                                                                                                                                                                                                                                                               |
| Date Submitted by the Author:   | 24-Aug-2019                                                                                                                                                                                                                                                                                                                                                                                                                     |
| Complete List of Authors:       | Nørøxe, Karen; Research Unit for General Practice; Aarhus University, Department of Public Health<br>Vedsted, Peter; Research Unit for General Practice<br>Bro, Flemming; Research Unit for General Practice; Aarhus University, Department of Public Health<br>Carlsen, Anders; Research Unit for General Practice<br>Pedersen, Anette; Research Unit for General Practice; Aarhus University, Department of Clinical Medicine |
| <b>Primary Subject Heading</b>: | Health services research                                                                                                                                                                                                                                                                                                                                                                                                        |
| Secondary Subject Heading:      | General practice / Family practice                                                                                                                                                                                                                                                                                                                                                                                              |
| Keywords:                       | Quality in health care < HEALTH SERVICES ADMINISTRATION & MANAGEMENT, General practitioners, Burnout, Job satisfaction, Patient satisfaction, Denmark                                                                                                                                                                                                                                                                           |
|                                 |                                                                                                                                                                                                                                                                                                                                                                                                                                 |

SCHOLARONE™  
Manuscripts

1  
2  
3 **Poor well-being and low job satisfaction in general practitioners and patients' change of general**  
4 **practitioner as an indicator of dissatisfaction with care: a Danish cohort study combining register**  
5 **data and survey data**  
6  
7  
8  
9  
10  
11  
12

13 Karen Busk Nørøxe<sup>1,3</sup>, Peter Vedsted<sup>1</sup>, Flemming Bro<sup>1,3</sup>, Anders Helles Carlsen<sup>1</sup>, Anette Fischer Pedersen<sup>2</sup>  
14  
15  
16

17 <sup>1</sup>Research Unit for General Practice, Aarhus, Bartholins Allé 2, 8000 Aarhus C, Denmark  
18

19 <sup>2</sup>Department of Clinical Medicine, Aarhus University, Palle Juul-Jensens Boulevard 82, 8200 Aarhus N, Denmark  
20

21 <sup>3</sup>Department of Public Health, Aarhus University, Bartholins Allé 2, 8000 Aarhus C, Denmark  
22  
23  
24  
25  
26  
27  
28  
29  
30  
31  
32  
33

34 **Corresponding author:**

35 Karen Busk Nørøxe

36 Research Unit for General Practice, Aarhus & Department of Public Health, Aarhus University, Denmark  
37  
38

39 E-mail: karen\_bn@live.dk  
40  
41  
42  
43

44 Word count, text: 3,562

45 Word count, abstract: 291

46 Number of tables: 3  
47  
48  
49  
50  
51  
52  
53  
54  
55  
56  
57  
58  
59  
60

## ABSTRACT

**Objectives:** Low job satisfaction and poor well-being (e.g. stress and burnout) among physicians may have negative consequences for patient experienced healthcare quality. In primary care, this could manifest in patients choosing another general practitioner (GP). The objective of this study was to examine change of GP (unrelated to change of address) among patients in relation to their GPs' job satisfaction, well-being, and self-assessed work-ability.

**Design and setting:** Data from a nationwide questionnaire survey among Danish GPs in May 2016 was combined with register data on their listed patients. Associations between patients' change of GP (COGP) in the 6-month study period (from May 2016) and the job satisfaction/well-being of their GP were estimated as risk ratios (RRs) at the individual patient level using binomial regression analysis. Potential confounders were included for adjustment.

**Participants:** The study cohort included 569,766 patients aged  $\geq 18$  years listed with 409 GPs in single-handed practices.

**Results:** COGP was significantly associated with occupational distress (burnout and low job satisfaction) in the GP. This association was seen in a dose-response like pattern. For burnout, associations were found for depersonalisation and reduced sense of personal accomplishment (but not for emotional exhaustion). The adjusted risk ratio was 1.40 (1.10-1.72) for patients listed with a GP with the lowest level of job satisfaction and 1.24 (1.01-1.52) and 1.40 (1.14-1.72) for patients listed with a GP in the most unfavourable categories of depersonalisation and sense of personal accomplishment (the most favourable categories used as reference). COGP was not associated with self-assessed work-ability or domains of well-being related to life in general.

1  
2  
3  
4  
5  
6  
7  
8  
9  
10  
11  
12  
13  
14  
15  
16  
17  
18  
19  
20  
21  
22  
23  
24  
25  
26  
27  
28  
29  
30  
31  
32  
33  
34  
35  
36  
37  
38  
39  
40  
41  
42  
43  
44  
45  
46  
47  
48  
49  
50  
51  
52  
53  
54  
55  
56  
57  
58  
59  
60

**Conclusions:** Patients' likelihood of changing GP increased with GP burnout and decreasing job satisfaction. These findings indicate a negative impact of GPs' work conditions and occupational well-being on patient-assessed quality of care.

**Keywords:** Quality in Health Care, General Practitioners, Burnout, Job Satisfaction, Patient Satisfaction, Denmark

For peer review only

### Strengths and limitations of this study

- Mental well-being and job satisfaction in general practitioners (GPs) were examined in relation to a register based (rather than a self-reported) measure of healthcare quality.
- Mental well-being and job satisfaction were assessed by validated rating scales.
- Precise linkage of each patient with a specific GP.
- Prospective study design.
- Adjustment for several potential confounders, but observed associations could still be mediated by unmeasured factors.

### BACKGROUND

Among general practitioners (GPs) stress, burnout and job dissatisfaction is prevalent[1] and may have important implications for quality in healthcare.[2–7] Yet, existing research examining the possible consequences of physician mental well-being/satisfaction for healthcare quality predominantly rely on physician self-report.

Patient satisfaction is by itself an essential component of healthcare quality and may furthermore reflect underlying dimensions of healthcare quality important for health outcomes. Such dimension include access to care and effectiveness of clinical and interpersonal care.[8] The possible negative implications of GP distress for patients' experience and satisfaction with primary healthcare is understudied.

A change of GP that is unrelated to change of address (because of moving) may indicate dissatisfaction with the GP.[9–11] The continuous relationship with a GP is highly valued by many patients[12], and a patient's change of GP is often preceded by careful consideration.[13] Satisfaction and decision-making regarding change of GP is strongly influenced by the patient's perception of interpersonal aspects of care.[9,13–15] GPs who face stress, burnout, and low job satisfaction may compromise with the quality of provided care and exhibit reduced empathic concern for the patients.[7,16,17] Moreover, GPs with high levels of occupational distress may have longer waiting times for consultations due to excessive workloads, which could add to the

1  
2 listed patients' propensity to change GP.[9,10] Consequently, the patient-GP relationship and the patient-  
3 assessed quality may suffer, and some patients may decide to change GP.  
4  
5  
6

7 This study aimed to examine whether distress levels and self-assessed work-ability in GPs were associated  
8 with change of GP among listed patients (voluntary disenrollment) as proxy for dissatisfaction with care.  
9  
10  
11  
12  
13  
14  
15

## 16 **METHODS**

### 17 **Setting**

18 Almost all citizens in Denmark (98%) are listed with a specific general practice, which they must consult for  
19 medical advice. GPs in Denmark provide comprehensive family medicine to their listed patients and act as  
20 gatekeepers and coordinators to the rest of the tax-funded healthcare system.[18] Patients are charged a fee  
21 (approx. €26) if they change general practice unrelated to change of address. Approximately, 27% of Danish  
22 GPs are organised in single-handed practices.  
23  
24  
25  
26  
27  
28  
29  
30

### 31 **Study population**

32 In May 2016, we invited all GPs in Denmark to participate in a questionnaire survey on their working  
33 conditions and mental well-being (response rate: 50.2%). The survey has been described in detail  
34 elsewhere.[1] For the purpose of this study, only GPs in single-handed practices were included as this  
35 allowed for accurate linkage of each patient to a specific GP. Furthermore, we did not include GPs who had  
36 locum(s) employed for > 20 hours per week, GPs with < 500 listed patients, and GPs who were newcomers in  
37 their current practice (i.e. arrived in 2016).  
38  
39  
40  
41  
42  
43  
44  
45  
46  
47

48 GPs were excluded if more than 90% of the listed patients changed GP in the study period, or if more than  
49 10% of the listed patients changed GP on the same date as this indicated restructuring of the practice (N = 7).  
50  
51  
52

53 Study cases were patients aged  $\geq 18$  years who were registered in the Danish Patient List Register (PLR) with  
54 an eligible general practice at the beginning of the study period. The PLR holds information on start and end  
55 dates of all registrations of patients with all general practices in Denmark. The 6-month study period started  
56  
57  
58  
59  
60

1  
2  
3 on 1 May 2016. A total of 569,776 patients listed with 402 GPs in single-handed practices were included in  
4  
5 the analyses.  
6  
7

### 8 **Change of GP**

9  
10 A *patient's change of GP (COGP)* was defined as being listed in the PLR with a start date with a general  
11  
12 practice in the study period and no new postal address or immigration within two months on both sides of  
13  
14 the start date. Information on change of address and immigration among patients was collected from the  
15  
16 Danish Civil Registration System.  
17  
18

### 19 **GP mental well-being and job satisfaction**

20  
21 The indicators of mental well-being (general and occupational) and job satisfaction were selected a priori  
22  
23 from the GP questionnaire. The indicators were measured by validated and reliable rating scales, which have  
24  
25 previously shown adequate consistency among Danish GPs.[1] *Job satisfaction* was assessed by the Warr-  
26  
27 Cook-Wall Job Satisfaction Scale (WCW-JSS), *perceived stress in general life* by Cohen's 10-item Perceived  
28  
29 Stress Scale (PSS-10), *general well-being* by the 5-item World Health Organisation Well-Being Index (WHO-5),  
30  
31 and *burnout* by the Maslach Burnout Inventory Human-Services-Survey (MBI-HSS). The MBI-HSS consists of  
32  
33 three subscales that measure three burnout dimensions: *emotional exhaustion*, *depersonalisation*, and *sense*  
34  
35 *of personal accomplishment*. *Self-rated work-ability* was measured by a single-item of the Work Ability Index  
36  
37 (WAI); the respondents scored their current work-ability against their lifetime best on a Likert scale. This  
38  
39 single item has shown high consistency with the full scale.[19]  
40  
41  
42  
43  
44

45 We categorised *job satisfaction*, *perceived stress*, *self-rated workability*, and each burnout dimension  
46  
47 according to quartiles of the scale scores. No well-established cut-off values exist that define significant  
48  
49 positive or negative levels of these measures. Burnout is often categorised according to the cut-off value  
50  
51 based on normative frequency distributions; this approach allows for comparison of burnout symptoms over  
52  
53 time and across populations, but it does not signify clinical significance.[20] As in previous research, we  
54  
55 categorised scales according to quartiles of the sum-scores to allow for exploration of non-linear and dose-  
56  
57 response like associations with COGP.[21,22] To evaluate burnout as a multidimensional construct[20], we  
58  
59  
60



1  
2 additionally categorised burnout based on a *composite burnout score*.<sup>[22]</sup> This score was calculated by  
3  
4 adding up points corresponding to the quartile of each subscale (reversed score for personal  
5  
6 accomplishment); 1 point was assigned for subscale scores in the first quartile, and 2, 3 and 4 points were  
7  
8 assigned for scores in the second, third and fourth quartiles, respectively. The composite score was  
9  
10 categorised into five groups: 3-4 points (corresponding to low burnout levels on all subscales), 5-6 points, 7-8  
11  
12 points, 9-10 points, and 11-12 points (corresponding to high burnout levels on all subscales). Finally, *general*  
13  
14 *well-being* was categorised as 'poor' for a scale score of  $\leq 50$  (the recommended cut-off value when using the  
15  
16 WHO-5 for screening for depression), 'good' for a score of  $>70$ , and 'moderate' for a score in between.<sup>[1]</sup>  
17  
18  
19

## 20 21 **Covariates**

22  
23 Potential confounders were selected a priori for adjustment. At GP level, information on gender and seniority  
24  
25 (years since qualification as a GP:  $\leq 5$ , 6-15, 16-25, or  $\geq 25$ ) was obtained from the questionnaire survey. At  
26  
27 patient level, information on each patient's demographic and socioeconomic characteristics was obtained  
28  
29 from Statistics Denmark.<sup>[23]</sup> This information included gender, age group at the beginning of the study  
30  
31 period (18-29, 30-39, 40-49, 50-59, 60-69, 70-79, or  $\geq 80$  years), marital status (married/cohabiting or living  
32  
33 alone), ethnic origin (Dane or immigrant/descendent), degree of urbanisation (rural area:  $< 1,000$   
34  
35 inhabitants, small city: 1,000-19,999 inhabitants, medium city: 20,000-99,999 inhabitants, or large city:  $>$   
36  
37 1,000,000 inhabitants), OECD-modified household income (categorised in pentiles), highest attained  
38  
39 educational level (low:  $\leq 10$  years, medium: 11-15 years, or high:  $> 15$  years), work affiliation (*in the labour*  
40  
41 *force*: employed and students, *outside the labour force*: unemployed, early retirement pensioner, personal or  
42  
43 sick leave, or *retired*).

44  
45  
46  
47  
48 Multimorbidity in patients was assessed by Charlson's Comorbidity Index (CCI) score (0, 1, 2, or  $\geq 3$ ), which  
49  
50 was calculated on the basis of the diagnoses registered in the Danish National Patient Register in 2006-  
51  
52 2015.<sup>[24]</sup> Finally, the percentage of general practices closed for intake of new patients in the patients'  
53  
54 municipality in 2016 ( $< 60\%$ , 60-80%, or  $> 80\%$ ) was included as a covariate obtained from the Organisation  
55  
56 of General Practitioners in Denmark<sup>[25]</sup> because the patient's option to change general practice depends on  
57  
58  
59  
60

1  
2 the availability of alternative practices.[9] GPs are generally allowed to close for intake of new patients when  
3  
4 their list size exceeds 1,600 patients per GP.  
5  
6

7 Information on socioeconomic characteristics was obtained for 2015. Missing information on educational  
8  
9 level (5.9%) was categorised as unknown. Patients with missing information on any other covariates were  
10  
11 excluded (N = 5.213 (0.9%)). Each patient was linked to the GP-related data through the GP's provider  
12  
13 number.[1] At patient level, the data were linked through the CRN; a unique personal identification number  
14  
15 assigned to all citizens in Denmark.[26] All personal identifiers were encrypted prior to analysis.[1]  
16  
17  
18

## 19 **Analyses**

20  
21 We calculated the share of patients with COGP and the corresponding 95% confidence interval (CI).  
22  
23 Associations between each of the included GP well-being indicators and COGP among patients were  
24  
25 calculated at the individual patient level by use of binomial regression analyses. The most favourable  
26  
27 category of the indicator examined was used as reference. Unadjusted and adjusted analyses were carried  
28  
29 out using robust variance estimation to account for clusters of patients at practice level. Adjusted models  
30  
31 included share of practices closed for new patient uptake in the municipality, GP factors (gender and  
32  
33 seniority) and patient factors (gender, age, marital status, ethnicity, city size, income, length of education,  
34  
35 work affiliation, comorbidity) in the categories described above.  
36  
37  
38  
39

40  
41 Prior to these analyses, we tested that the mean time at risk of COGP per listed patient did not vary across  
42  
43 the GP well-being/satisfaction categories. Patients were considered to be at risk until death, immigration, or  
44  
45 change of general practice for any reason.  
46  
47

48 A p-value of  $\leq 0.05$  was considered statistically significant. Analyses were performed using Stata, version 15.  
49  
50

## 51 **Patient and public involvement**

52  
53 This research was done without patient or public involvement.  
54  
55  
56  
57

## 58 **RESULTS**

During the 6-month study period, we identified 6,648 (1.17%) cases of COGP among the included patients (i.e. change of GP without change of address). The characteristics of the study cohort (N = 569,776) and the share of patients with COGP are shown in Table 1.

**Table 1.** Patient characteristics according to COGP in the 6-month study period.

|                                                                |                          | All patients<br>N (%) | Patients with COGP<br>n per 1000 (95%CI) |
|----------------------------------------------------------------|--------------------------|-----------------------|------------------------------------------|
| <b>Total</b>                                                   |                          | 569,776 (100)         | 11.7 (11.4-11.9)                         |
| <b>Gender</b>                                                  | Female                   | 287,097 (50.4)        | 13.1 (12.7-13.6)                         |
|                                                                | Male                     | 282,679 (49.6)        | 10.2 (9.8-10.5)                          |
| <b>Age group, years</b>                                        | 18 – 29                  | 116,342 (20.4)        | 15.5 (14.8-16.2)                         |
|                                                                | 30 – 39                  | 85,453 (15.0)         | 13.7 (12.9-14.4)                         |
|                                                                | 40 – 49                  | 96,114 (16.8)         | 11.1 (10.4-11.7)                         |
|                                                                | 50 – 59                  | 94,716 (16.6)         | 9.5 (8.9-10.1)                           |
|                                                                | 60 – 69                  | 83,667 (14.7)         | 9.1 (8.5-9.8)                            |
|                                                                | 70 – 79                  | 61,533 (10.8)         | 10.1 (9.3-10.9)                          |
|                                                                | ≥ 80                     | 31,951 (5.6)          | 10.3 (9.3-10.9)                          |
| <b>Marital status</b>                                          | Married / cohabiting     | 343,049 (60.2)        | 11.5 (11.1-11.9)                         |
|                                                                | Living alone             | 226,727 (39.8)        | 11.9 (11.5-12.4)                         |
| <b>Ethnicity</b>                                               | Danish                   | 491,661 (86.3)        | 11.4 (11.1-11.8)                         |
|                                                                | Immigrant/descendant     | 78,115 (13.7)         | 13.1 (12.3-13.8)                         |
| <b>Education, years</b>                                        | ≤ 10                     | 142,070 (24.9)        | 12.5 (11.9-13.1)                         |
|                                                                | 11-15                    | 227,689 (40.0)        | 10.8 (10.4-11.3)                         |
|                                                                | > 15                     | 166,644 (29.2)        | 11.8 (11.3-12.4)                         |
|                                                                | Unknown                  | 33,373 (5.9)          | 12.9 (11.8-14.2)                         |
| <b>Work affiliation</b>                                        | In the labour force      | 356,016 (62.5)        | 11.4 (11.0-11.8)                         |
|                                                                | Outside the labour force | 85,620 (15.3)         | 15.3 (14.5-16.2)                         |
|                                                                | Retired                  | 128,140 (22.5)        | 9.9 (9.4-10.5)                           |
| <b>OECD-modified household income, pentiles</b>                | 1 <sup>st</sup> (low)    | 113,956 (20.0)        | 13.3 (12.7-14.0)                         |
|                                                                | 2 <sup>nd</sup>          | 113,955 (20.0)        | 12.8 (12.2-13.5)                         |
|                                                                | 3 <sup>rd</sup>          | 113,957 (20.0)        | 11.5 (10.9-12.1)                         |
|                                                                | 4 <sup>th</sup>          | 113,953 (20.0)        | 10.5 (9.9-11.0)                          |
|                                                                | 5 <sup>th</sup> (high)   | 113,955 (20.0)        | 10.2 (9.7-10.8)                          |
| <b>Multimorbidity index score</b>                              | 0                        | 460,769 (80.9)        | 11.7 (11.4-12.1)                         |
|                                                                | 1                        | 52,485 (9.2)          | 11.6 (10.8-12.6)                         |
|                                                                | 2                        | 31,899 (5.6)          | 11.0 (9.8-12.1)                          |
|                                                                | ≥ 3                      | 24,633 (4.3)          | 11.2 (10.0-12.6)                         |
| <b>Practices closed for patient intake in the municipality</b> | < 60%                    | 264,254 (46.4)        | 12.1 (11.7-12.6)                         |
|                                                                | 60-80%                   | 200,187 (35.1)        | 12.1 (11.6-12.6)                         |
|                                                                | > 80%                    | 105,335 (18.5)        | 9.7 (9.1-10.3)                           |
| <b>City size</b>                                               | Rural area               | 89,014 (15.6)         | 10.8 (10.1-11.5)                         |
|                                                                | Small city               | 137,286 (24.1)        | 11.7 (11.1-12.3)                         |
|                                                                | Medium city              | 88,920 (15.6)         | 11.4 (10.7-12.1)                         |
|                                                                | Large city               | 254,556 (44.7)        | 12.1 (11.4-12.5)                         |
| <b>Duration of GP-patient relationship</b>                     | < 2 years                | 139,880 (24.6)        | 17.4 (16.7-18.1)                         |
|                                                                | 2 - 8 years              | 203,640 (35.7)        | 12.1 (11.7-12.6)                         |
|                                                                | > 8 years                | 226,256 (39.7)        | 7.7 (7.4-8.1)                            |

COGP: change of general practitioner without change of address.

Table 2 displays GP characteristics and well-being.

**Table 2.** Description of the GPs included in the study (N = 402)

| <b>GP and practice characteristics</b>                       |                  |
|--------------------------------------------------------------|------------------|
| <b>Gender, n (%)</b>                                         |                  |
| Female                                                       | 178 (44.3)       |
| Male                                                         | 224 (55.7)       |
| <b>Age, years; mean (SD)</b>                                 | 56.4 (8.4)       |
| <b>Years since qualification as a GP, mean (SD)</b>          | 18.9 (9.4)       |
| <b>List size, median (IQR)</b>                               | 1693 (1544-1935) |
| <b>COGP per 1000 listed patients, median (IQR); range</b>    | 9.4 (5.9-14.7)   |
| <b>Well-being and satisfaction</b>                           |                  |
| <b>Job satisfaction score (WCW-JSS), median (IQR)</b>        | 50 (40-58)       |
| <b>Emotional exhaustion score (MBI-HSS), median (IQR)</b>    | 20 (13-28)       |
| <b>Depersonalisation score (MBI-HSS), median (IQR)</b>       | 5 (3-8)          |
| <b>Personal accomplishment score (MBI-HSS), median (IQR)</b> | 35 (31-38)       |
| <b>Composite burnout score, n (%)</b>                        |                  |
| 3-4 (low)                                                    | 75 (18.7)        |
| 5-6                                                          | 80 (19.9)        |
| 7-8                                                          | 93 (23.1)        |
| 9-10                                                         | 93 (23.1)        |
| 11-12 (high)                                                 | 61 (15.2)        |
| <b>Perceived general stress score (PSS-10), median (IQR)</b> | 12 (8-17)        |
| <b>General well-being (WHO-5)</b>                            |                  |
| Good (score >70)                                             | 121 (30.6)       |
| Moderate                                                     | 197 (49.7)       |
| Poor (score ≤ 50)                                            | 78 (19.7)        |
| <b>Self-assessed work-ability, n (%)</b>                     |                  |
| Score 10 (best)                                              | 81 (20.4)        |
| Score 9                                                      | 122 (30.8)       |
| Score 8                                                      | 111 (28.0)       |
| Score 7                                                      | 82 (20.7)        |

IQR: interquartileinterval. COGP: Change of general practitioner without change of address. WCW-JSS: Warr-Cook-Wall Job Satisfaction Scale. MBI-HSS: Maslach Burnout Inventory Human-Services-Survey. PPS-10: Cohens Perceived Stress Scale. WHO-5: World Health Organisation Well-Being Index.

Note: Number of GPs varies due to partial response to the questionnaire for six GPs.

Table 3 shows the results of the regression analyses.

**Table 3.** Patients' COGP in relation to GP's job satisfaction, well-being, and self-assessed work-ability

|  | RR (95% CI) | adj. RR* (95% CI) |
|--|-------------|-------------------|
|  |             |                   |

|                                            |                         |                         |
|--------------------------------------------|-------------------------|-------------------------|
| <b>Job satisfaction</b> (quartiles)        |                         |                         |
| 4 <sup>th</sup> (high)                     | 1.00                    | 1.00                    |
| 3 <sup>rd</sup>                            | 1.08 (0.87-1.33)        | 1.08 (0.88-1.32)        |
| 2 <sup>nd</sup>                            | 1.21 (0.98-1.49)        | <b>1.21 (1.01-1.48)</b> |
| 1 <sup>st</sup> (low)                      | <b>1.36 (1.08-1.71)</b> | <b>1.40 (1.10-1.72)</b> |
| <b>Emotional exhaustion</b> (quartiles)    |                         |                         |
| 1 <sup>st</sup> (low)                      | 1.00                    | 1.00                    |
| 2 <sup>nd</sup>                            | 1.00 (0.80-1.25)        | 1.05 (0.85-1.31)        |
| 3 <sup>rd</sup>                            | 0.88 (0.72-1.09)        | 0.92 (0.76-1.13)        |
| 4 <sup>th</sup> (high)                     | 1.03 (0.31-1.28)        | 1.04 (0.86-1.27)        |
| <b>Depersonalisation</b> (quartiles)       |                         |                         |
| 1 <sup>st</sup> (low)                      | 1.00                    | 1.00                    |
| 2 <sup>nd</sup>                            | 1.15 (0.94-1.42)        | 1.18 (0.98-1.44)        |
| 3 <sup>rd</sup>                            | 1.15 (0.93-1.43)        | 1.22 (0.99-1.50)        |
| 4 <sup>th</sup> (high)                     | 1.21 (0.98-1.50)        | <b>1.24 (1.01-1.52)</b> |
| <b>Personal accomplishment</b> (quartiles) |                         |                         |
| 1 <sup>st</sup> (high)                     | 1.00                    | 1.00                    |
| 2 <sup>nd</sup>                            | 1.10 (0.88-1.37)        | 1.13 (0.91-1.39)        |
| 3 <sup>rd</sup>                            | <b>1.27 (1.06-1.52)</b> | <b>1.34 (1.12-1.59)</b> |
| 4 <sup>th</sup> (low)                      | <b>1.36 (1.09-1.69)</b> | <b>1.40 (1.14-1.72)</b> |
| <b>Composite burnout score</b>             |                         |                         |
| 3-4 (low)                                  | 1.00                    | 1.00                    |
| 5-6                                        | 1.16 (0.92-1.47)        | 1.15 (0.92-1.44)        |
| 7-8                                        | <b>1.24 (1.00-1.53)</b> | <b>1.30 (1.06-1.58)</b> |
| 9-10                                       | <b>1.30 (1.05-1.61)</b> | <b>1.38 (1.12-1.71)</b> |
| 11-12 (high)                               | 1.22 (0.96-1.56)        | 1.21 (0.96-1.52)        |
| <b>Perceived stress</b> (quartiles)        |                         |                         |
| 1 <sup>st</sup> (low)                      | 1.00                    | 1.00                    |
| 2 <sup>nd</sup>                            | 1.01 (0.82-1.24)        | 1.04 (0.86-1.25)        |
| 3 <sup>rd</sup>                            | 1.13 (0.90-1.42)        | 1.17 (0.93-1.46)        |
| 4 <sup>th</sup> (high)                     | 0.99 (0.82-1.20)        | 0.96 (0.80-1.15)        |
| <b>General well-being</b>                  |                         |                         |
| Good                                       | 1.00                    | 1.00                    |
| Moderate                                   | 1.06 (0.89-1.27)        | 1.07 (0.89-1.27)        |
| Poor                                       | 1.02 (0.83-1.25)        | 1.01 (0.82-1.24)        |
| <b>Self-assessed work-ability</b>          |                         |                         |
| 4 <sup>th</sup> (high)                     | 1.00                    | 1.00                    |
| 3 <sup>rd</sup>                            | 0.94 (0.75-1.17)        | 0.98 (0.79-1.22)        |
| 2 <sup>nd</sup>                            | 1.09 (0.86-1.38)        | 1.13 (0.91-1.42)        |
| 1 <sup>st</sup> (low)                      | 0.92 (0.73-1.15)        | 0.92 (0.74-1.15)        |

COGP: change of general practitioner without change of address. RR: risk ratio.

\*adjusted for patient age, gender, socioeconomic factors, multimorbidity, city size, duration of GP-patient relationship and percentage of practices closed for patient intake in the municipality (categorised as presented in Table 1) and for GP seniority and gender.

**Bold** indicates significant results ( $p \leq 0.05$ ).

The likelihood of COGP increased with depersonalisation, diminishing sense of personal accomplishment, and decreasing job satisfaction in the GP with whom the patient was listed. The adjusted RR was 1.40 (1.10-1.72)

1  
2 for patients listed with a GP with the lowest level of job satisfaction and 1.24 (1.01-1.52) and 1.40 (1.14-1.72)  
3  
4 for patients listed with a GP in the most unfavourable categories of the burnout dimensions  
5  
6  
7 depersonalisation and sense of low personal accomplishment.  
8  
9

10 Likewise, COGP tended to increase with a higher composite burnout score, although a small decline was seen  
11  
12 at the highest level of burnout. Yet, the emotional exhaustion dimension of burnout was not associated with  
13  
14 COPG. Likewise, no associations were found for perceived stress, general well-being, or self-assessed work-  
15  
16 ability.  
17  
18  
19  
20  
21

## 22 **DISCUSSION**

### 23 **Main findings**

24 Patients' likelihood of changing GP increased with decreasing job satisfaction in the GP with whom they were  
25  
26 listed. Likewise, patients listed with a GP with high levels of depersonalisation, feelings of low personal  
27  
28 accomplishment, or a high composite burnout score were more likely to change GP compared to patients  
29  
30 listed with a GP with low burnout scores. Notably, these relationships had a dose-response pattern, although  
31  
32 a small decrease was seen for the highest composite burnout level. In contrast, COGP was unrelated to  
33  
34 emotional exhaustion, perceived stress, general well-being, and self-assessed work-ability in the GP.  
35  
36  
37  
38  
39  
40

### 41 **Strengths and limitations**

42 Major strengths of this study include the large sample size and the precise linkage of each patient to an  
43  
44 individual GP by the combining of register-based data and survey data. The Danish national registers provide  
45  
46 highly valid data.[26] The survey data covered multiple distinct and yet interrelated aspects of GP well-being,  
47  
48 which was measured by validated and reliable assessment scales. The categorisation of all variables were  
49  
50 performed according to predetermined procedures. The sample size allowed us to rank GP well-being  
51  
52 indicators using multiple categories, which enabled exploration of non-linear and dose-response like  
53  
54 associations. Still, the categorisation might not distinguish the level of poor well-being that may affect the  
55  
56  
57  
58  
59  
60

1  
2 patient-experienced quality of care. The restriction of the study period to 6 months reduced the risk of  
3  
4  
5 fluctuations in the mental state of the GP during the study period.  
6

7 We assessed GP well-being prior to COGP and the GPs were unaware of the collection of data on COGP. Still,  
8  
9 we cannot rule out that caring for a patient population with a high propensity to change GP could affect GP  
10  
11 well-being.  
12

13  
14 We used COGP as a proxy for dissatisfaction with the GP. The literature support COGP as a valid indicator of  
15  
16 patient-assessed quality.[9–11] Still, other explanation than dissatisfaction with GP care may account for  
17  
18 some patients' COGP. Moreover, patients change GP after careful consideration; some may even stay with  
19  
20 their GP even if they are dissatisfied and have a poor relationship with their GP.[9,13,14] COGP is a rare  
21  
22 event (1.17% of patients in the study) and may capture only major dissatisfaction while leaving minor  
23  
24 dissatisfaction undetected. These matters impair the use of COGP as a proxy for patient satisfaction and  
25  
26 could result in an underestimation of the influence of GP-related factors on patient satisfaction. In addition,  
27  
28 not all patients consult their GP on a regular basis, which could leave some of the study cases 'unexposed' to  
29  
30 their GP, which may also increase the risk of an underestimation.  
31  
32

33  
34  
35 Factors beyond the control of the GP may affect patients' COGP and could thus confound the results if  
36  
37 inadequately controlled for. First, patient factors are important determinants of COGP, and bias related to  
38  
39 patient characteristics may occur. For instance, complex healthcare needs in patients may relate to GP  
40  
41 distress[27] as well as to patients' propensity to change GP. As seen from Table 1, patients inclined to COGP  
42  
43 seem to include patients who were more likely to consult with complex healthcare needs (e.g. patients  
44  
45 outside the labour force) and patients who were less inclined to consult with complex needs (e.g. younger  
46  
47 people). Overall, the role of case-mix of patients is complex and may confound the results in both directions.  
48  
49 Next, the likelihood of COGP in response to poor care may decrease with the availability of alternative  
50  
51 practices locally. A high number of practices closed for patient intake may reflect workforce shortage, which  
52  
53 may be associated with increased levels of GP workload and occupational distress.[28] Therefore, we  
54  
55 adjusted for a lack of alternative practices. If inadequately adjusted for, this would most likely result in an  
56  
57 underestimation of the observed relationship between GP distress and COGP in patients. Additionally,  
58  
59  
60

1  
2 unmeasured characteristics of the GPs and their clinics (e.g. personality, clinical skills, and work conditions)  
3  
4 could confound the results. Overall, we adjusted for several potential confounders and we believe that  
5  
6 unmeasured confounding is unlikely to fully account for the observed associations.  
7  
8  
9

10 The study population was restricted to patients listed with GPs in single-handed practices who responded to  
11  
12 the survey, which could impair generalisability of findings. Yet, we have no reason to assume that the  
13  
14 associations examined depended on the GPs' approach to participation or on the type of practice. The  
15  
16 prevalence of burnout and low job satisfaction was the same for GPs in single-handed practices and GPs in  
17  
18 partnership practices.[1]  
19

### 20 21 22 **Comparison with the literature** 23

24 To our knowledge, only one previous study has explored the possible impact of physician well-  
25  
26 being/satisfaction on healthcare quality by using change of GP among patients as a quality indicator.[29]  
27  
28 Lower levels of job satisfaction were associated with a higher propensity to change GP in patients with pain,  
29  
30 whereas no such relationship was seen in patients with depression. For both patient groups, however,  
31  
32 patients of physicians with greater job satisfaction reported greater levels of trust and confidence in their  
33  
34 physician.[29] In line with our findings, the existing body of research suggests that higher levels of job  
35  
36 satisfaction in physicians induce higher levels of patient satisfaction[30] and better patient-physician  
37  
38 relationships.[7]  
39  
40

41  
42 For burnout, the results of a recent review and meta-analysis examining the potential implications of  
43  
44 physician burnout on patient-assessed quality were in accordance with our findings; depersonalisation and  
45  
46 low sense of personal accomplishment were both significantly associated with reduced patient-reported  
47  
48 satisfaction, whereas emotionally exhaustion was not.[6] Several reviews support that physician burnout  
49  
50 may reduce the patient-assessed quality of care, but they also point to the need for further research.[2–4,6]  
51  
52  
53

54 There is consistent evidence that the patient's perception of the GP-patient relationship is an important  
55  
56 determinant of patient satisfaction[31–33] and that interpersonal aspects of care strongly influence the  
57  
58 decision-making regarding COGP. Not feeling recognised by the GP, poor communication, and lack of  
59  
60



1  
2 confidence and trust in the GP have been identified as important drivers in patients' decision to change  
3  
4 GP.[9,13–15].

5  
6  
7 Empirical research examining the potential impact of GP burnout and job satisfaction on interpersonal  
8  
9 aspects of care is sparse, but theoretically, it is plausible that interpersonal aspects of care mediate the  
10  
11 observed associations between occupational distress and COGP. Burnout has been described as an erosion  
12  
13 of engagement initiated by loss of internal resources as a response to chronic job-related stress.[20] A  
14  
15 suggested consequence of burnout is a hesitation to invest resources in the job as an attempt to protect  
16  
17 against further resource depletion.[16] Hence, burned out GPs may be inclined to invest less in the  
18  
19 relationship with their patients. Depersonalisation refers to the development of an emotional detachment to  
20  
21 people related to work and involves lack of compassion and a cynical attitude towards patients.  
22  
23

24  
25  
26 Albeit reverse causality cannot be excluded, one study found that GPs with higher levels of job satisfaction  
27  
28 asked more psychosocial questions and showed more affective communication.[34] Other studies found that  
29  
30 GPs with lower sense of personal accomplishment used less affective communication and were less patient-  
31  
32 centred[35] and that patients listed with more depersonalised and emotionally exhausted GPs were less  
33  
34 satisfied with the consultations with their GP.[36] However, other studies found no indications that burnout  
35  
36 or job dissatisfaction impaired the quality of interpersonal care.[37–39] Some of these differences may be  
37  
38 attributable to different burnout definitions.  
39  
40

41  
42 It may seem contradictory that emotional exhaustion was not associated with COGP, while clear associations  
43  
44 were found for the remaining two burnout components and for job satisfaction. Different explanations may  
45  
46 account for this. Firstly, the influence of burnout on job performance may depend on the stage of  
47  
48 burnout.[3,40] In the initial stage, emotional exhaustion may be the only symptom and by overstretching  
49  
50 themselves GPs may compensate for the potential negative effects of adverse work conditions on patient  
51  
52 care.[41,42] Moreover, high conscientiousness could be a risk factor for burnout. Thus, emotionally  
53  
54 exhausted GPs may exhibit high levels of thoroughness and attentiveness to patients' needs in clinical  
55  
56 encounters, and hence their patients may experience excellent care.[3,38,42] In later stages of burnout,  
57  
58 carelessness and disengagement may become more dominant. This possible mix of excellent care provision  
59  
60

1  
2 and compromised care provision in emotionally exhausted GPs may counterbalance each other in the  
3  
4 analysis. The finding that the frequency of COGP tended to increase with the composite burnout score could  
5  
6 supports this, as higher composite scores are likely to reflect later stages of burnout. Secondly, as for the  
7  
8 traditional cut-off levels of burnout, our categorisation of emotional exhaustion might not be suitable for  
9  
10 identifying the level of exhaustion that causes functional impairment. A too low cut-off value could attenuate  
11  
12 measured relationships.[3] Lastly, personal and professional values and attitudes that predispose to  
13  
14 depersonalisation, low sense of personal accomplishment, and dissatisfaction could influence clinical  
15  
16 practice.[43] Hence, the observed associations might reflect underlying attributes of the GP.  
17  
18  
19

20  
21 While COGP was associated with work-specific aspects of well-being, no associations were found for well-  
22  
23 being measures related to life in general. This suggests that job-related factors are most essential in the  
24  
25 relationship between provider well-being and patient-assessed quality of care. Yet, the actual work  
26  
27 conditions (and not only the GPs' affective response to them) may play a causal role in this relationship. For  
28  
29 instance, GPs with higher workloads may have longer waiting times and shorter consultations, which could  
30  
31 cause some patients to change GP.[9,10]  
32  
33

34  
35 COGP among patients was not associated with the self-reported work-ability among GPs. Objective versus  
36  
37 self-reported measurement of quality is controversial in research on the potential consequences of provider  
38  
39 well-being for healthcare quality; the association with self-reported quality of care is well-documented, yet  
40  
41 the reliability in terms of actual quality of care remains uncertain.[3] Quality of care is multifaceted and the  
42  
43 absence of association in our study should not be considered a proof that self-assessed work-ability is an  
44  
45 unreliable measure of care quality. Previously, we found lower self-reported work-ability as well as poor  
46  
47 well-being in GPs to be associated with a higher rate of potentially preventable hospitalisations in listed  
48  
49 patients, which could indicate suboptimal primary healthcare provision.[22] In the assessment of work-  
50  
51 ability, GPs may attach much importance to more bio-medical aspects of care, such as the ability to diagnose  
52  
53 and provide treatment according to the best medical standards. Most patients may not be qualified to judge  
54  
55 such aspects and tend to focus more on the interpersonal aspects of care in their overall assessment of  
56  
57 quality.[44]  
58  
59  
60

## Implications

The study findings imply that GPs' occupational well-being and job satisfaction influence patient satisfaction measured as COGP. Hence, improving job satisfaction and engagement and combating burnout seems important to improve patient-assessed quality of care.

The possible implications are highly important: GP distress is prevalent, and COGP among patients may reflect serious aspects of care quality. This lends support for the conception that attention should be paid to the work conditions and the well-being of healthcare providers in the pursuit of optimal healthcare.

However, more research is needed to establish the connection between GP well-being and healthcare provision.

## Conclusion

We found that patients' likelihood of changing GP increased with decreasing GP job satisfaction and increasing GP burnout. We found no association between COGP among patients and emotional exhaustion in the GP, whereas depersonalisation and reduced sense of personal accomplishment both increased the likelihood of COGP. Overall, the findings suggest that the degree to which the GP thrives in the job influences the patient assessed quality of care provided.

## DECLARATIONS

### Authors' contributions

All authors contributed substantially to the design of the study. KBN performed the statistical analyses in consultation with AHC. KBN wrote the first draft of the article. AFP, FB, PV, and AHC assisted in writing and revising the manuscript. All authors read and approved the final manuscript.

### Funding

1  
2 This work was supported by the Danish National Research Foundation for Primary Care and by the Health  
3 Foundation. The funding bodies had no role in the conduction of the study or in the writing of the  
4  
5  
6  
7 manuscript.  
8  
9

### 10 11 **Competing interests**

12  
13 The authors declare that they have no competing interests.  
14  
15

### 16 17 18 **Ethics approval**

19  
20 The project was approved by the Danish Data Protection Agency (J.no. 2016–41-4648). According to Danish  
21 law, approval by the Danish National Committee on Health Research Ethics was not required as no  
22  
23 biomedical intervention was performed. Respondents gave their content to participate by responding to the  
24  
25 questionnaire. Personally identifiable information on GPs and patients were re-coded and anonymised at  
26  
27 Statistics Denmark prior to data analysis.  
28  
29  
30  
31  
32  
33

### 34 35 **Availability of data and materials**

36 Danish data protection regulations prohibit disclosure of data to any third party without prior permission  
37  
38 from the Danish Data Protection Agency. Thus, the data from this study cannot be made publicly available.  
39  
40  
41  
42  
43  
44  
45  
46  
47  
48  
49  
50  
51  
52  
53  
54  
55  
56  
57  
58  
59  
60

**REFERENCES**

1. Nørøxe KB, Pedersen AF, Bro F, Vedsted P. Mental well-being and job satisfaction among general practitioners: a nationwide cross-sectional survey in Denmark. *BMC Family Practice*. 2018;19(1)1.
2. West CP, Dyrbye LN, Shanafelt TD. Physician burnout: contributors, consequences and solutions. *J Intern. Med*. 2018;283:516-529.
3. Rathert C, Williams ES, Linhart H. Evidence for the quadruple aim. *Med Care*. 2018;56:976–84.
4. Dewa CS, Loong D, Bonato S, Trojanowski L, Rea M. The relationship between resident burnout and safety-related and acceptability-related quality of healthcare: A systematic literature review. *BMC Med Educ*. 2017;17(1):195.
5. Hall LH, Johnson J, Watt I, Tsipa A, Connor DBO. Healthcare staff wellbeing , burnout, and patient safety: A systematic review. *PLoS One*. 2016;11(7).
6. Panagioti M, Geraghty K, Johnson J, Zhou A, Panagopoulou E, Chew-Graham C, et al. Association between physician burnout and patient safety, professionalism, and patient satisfaction: A systematic review and meta-analysis. *JAMA Intern Med*. 2018;178:1317–30.
7. Williams ES, Skinner AC. Outcomes of physician job satisfaction: a narrative review, implications, and directions for future research. *Health Care Manage Rev*. 2015;28:119–39.
8. Campbell SM, Roland MO, Buetow SA. Defining quality of care. *Soc Sci Med*. 2000;51(11):1611-25.
9. Nagraj S, Abel G, Paddison C, Payne R, Elliott M, Campbell J, Roland M. Changing practice as a quality indicator for primary care: Analysis of data on voluntary disenrollment from the English GP Patient Survey. *BMC Fam Pract*. 2013;14:89.
10. Gandhi IG, Parle JV, Greenfield SM, Gould S. A quality investigation into why patients change their GPs. *Fam Pract*. 1997;14(1):49-57.
11. Grooss K, Hjertholm P, Carlsen AH, Vedsted P. Patients with cancer and change of general practice: A Danish population-based cohort study. *Br J Gen Pract*. 2016;66:e491–8.
12. Salisbury C, Sampson F, Ridd M, Montgomery AA. How should continuity of care in primary health care be assessed? *Br J Gen Pract*. 2009;59:276–82.
13. Frederiksen HB, Kragstrup J, Dehlholm-Lambertsen B. Attachment in the doctor-patient relationship in general practice: A qualitative study. *Scand. J Prim Health Care*. 2010;28:185–90.
14. Frederiksen HB, Kragstrup J, Dehlholm-Lambertsen G. It's all about recognition! Qualitative study of the value of interpersonal continuity in general practice. *BMC Fam Pract*. 2009;10:1–8.
15. Federman AD, Cook EF, Phillips RS, Puopola AL, Haas JS, Brennan TA, et al. Intention to discontinue care among primary care patients: Influence of physician behavior and process of care. *J Gen Intern Med*. 2001;16:668–74.

16. Halbesleben JRB, Rathert C. Linking physician burnout and patient outcomes. *Health Care Manage Rev.* 2008;33:29–39.
17. Maslach C, Wilmar BS, Leiter MP. Job burnout. *Annu Rev Psychol.* 2001;52:397-422.
18. Pedersen KM, Andersen JS, Sondergaard J. General Practice and Primary Health Care in Denmark. *J Am Board Fam Med.* 2012;25:34–8.
19. Ahlstrom L, Grimby-Ekman A, Hagberg M, Dellve L. The work ability index and single-item question: Associations with sick leave, symptoms, and health - A prospective study of women on long-term sick leave. *Scand J Work Environ Heal.* 2010;36:404–12.
20. Schaufeli WB, Leiter MP, Maslach C, Michael PL, Christina M. Burnout: 35 years of research and practice. *Career Dev Int.* 2009;14:204–20.
21. Pedersen AF, Sørensen JK, Bruun NH, Christensen B, Vedsted P. Risky alcohol use in Danish physicians: Associated with alexithymia and burnout? *Drug Alcohol Depend. Elsevier Ireland Ltd;* 2016;160:119–26.
22. Nørøxe KB., Pedersen AF, Carlsen AH, Bro F, Vedsted P. Mental well-being, job satisfaction, and self-rated workability in general practitioners and hospitalisations for ambulatory care sensitive conditions among listed patients: a cohort study combining survey data on GPs and register data on patients. *BMJ Qual Saf;* 2019.
23. Statistics Denmark. <https://www.dst.dk/en/Statistik/dokumentation>. Accessed 20 Aug 2018.
24. Thygesen SK, Christiansen CF, Christensen S, Lash TL, Sørensen HT. The predictive value of ICD-10 diagnostic coding used to assess Charlson comorbidity index conditions in the population-based Danish National Registry of Patients. *BMC Med Res Methodol.* 2011;11:83.
25. PLO analyse. Praksis med lukket for tilgang [Practices closed for intake of patients], 2016. Available from: [https://www.laeger.dk/sites/default/files/plo\\_analyse\\_praksis\\_lukket\\_med\\_tilgang.pdf](https://www.laeger.dk/sites/default/files/plo_analyse_praksis_lukket_med_tilgang.pdf). Accessed 20 Aug 2018.
26. Pedersen CB. The Danish civil registration system. *Scand J Public Health* 2011;39(7):22-5.
27. Pedersen AF, Vedsted P. Understanding the inverse care law: a register and survey-based study of patient deprivation and burnout in general practice. *Int J Equity Health.* 2014;13:121.
28. Marchand C, Peckham S. Addressing the crisis of GP recruitment and retention: A systematic review. *Br J Gen Pract.* 2017;67(657).
29. Grembowski D, Paschane D, Diehr P, Katon W, Martin D, Patrick DL. Managed care, physician job satisfaction, and the quality of primary care. *J Gen Intern Med.* 2005;20:271–7.
30. Scheepers RA, Boerebach BCM, Arah OA, Heineman MJ, Lombarts KMJM. A systematic review of the impact of physicians' occupational well-being on the quality of patient care. *Int J Behav Med.* 2015;22:683–98.
31. Vedsted P, Heje HN. Association between patients' recommendation of their GP and their evaluation of the GP. *Scand J Prim Health Care.* 2008;26:228–34.

1  
2  
3  
4  
5  
6  
7  
8  
9  
10  
11  
12  
13  
14  
15  
16  
17  
18  
19  
20  
21  
22  
23  
24  
25  
26  
27  
28  
29  
30  
31  
32  
33  
34  
35  
36  
37  
38  
39  
40  
41  
42  
43  
44  
45  
46  
47  
48  
49  
50  
51  
52  
53  
54  
55  
56  
57  
58  
59  
60

32. Wensing M, Jung HP, Mainz J, Olesen F, Grol R. A systematic review of the literature on patient priorities for general practice care. Part 1: Description of the research domain. *Soc Sci Med*. 1998;47(10):1573-88.
33. Crow R, Gage H, Hampson S, Hart J, Kimber A, Storey L, Thomas H. The measurement of satisfaction with healthcare: implications for practice from a systematic review of the literature. *Health Techn Ass*. 2002;6(32).
34. Bensing JM, Brink-Muinen A van den, Boerma W, Dulmen S van. The manifestation of job satisfaction in doctor-patient communication; a ten-country European study. *Int J Pers Cent Med*. 2013;3:44-52.
35. Zantinge EM, Verhaak PFM, De Bakker DH, Van Der Meer K, Bensing JM. Does burnout among doctors affect their involvement in patients' mental health problems? A study of videotaped consultations. *BMC Fam Pract*. 2009;10:1-10.
36. Anagnostopoulos F, Liolios E, Persefonis G, Slater J, Kafetsios K, Niakas D. Physician burnout and patient satisfaction with consultation in primary health care settings: Evidence of relationships from a one-with-many design. *J Clin Psychol Med Settings*. 2012;19:401-10.
37. Orton P, Orton C, Gray DP. Depersonalised doctors: A cross-sectional study of 564 doctors, 760 consultations and 1876 patient reports in UK general practice. *BMJ Open*. 2012;2:1-8.
38. Ožvačić Adžić Z, Katić M, Kern J, Soler JK, Cerovečki V, Polašek O. Is Burnout in Family Physicians in Croatia Related to Interpersonal Quality of Care? *Arch Ind Hyg Toxicol*. 2013;64:255-64.
39. Ratanawongsa N, Roter D, Beach MC, Laird SL, Larson SM, Carson KA, et al. Physician burnout and patient-physician communication during primary care encounters. *J Gen Intern Med*. 2008;23:1581-8.
40. Pedersen AF, Carlsen AH, Vedsted P. Association of GPs' risk attitudes, level of empathy, and burnout status with PSA testing in primary care. *Br J Gen Pract*. 2015;65:e845-51.
41. Linzer M, Manwell LB, Williams ES, Bobula JA, Brown RL, Varkey AB, Man B, McMurray JE, Maquire A, Horner-Ibler B, Schwarz MD. Working conditions in primary care: Physician reactions and care quality. *Ann Intern Med*. 2009;151(1):28-36.
42. Maslach C, Leiter MP, Schaufeli W. Measuring Burnout. *Oxford Handb Organ Well Being*. 2009;86-108.
43. Bakker AB, Demerouti E, Sanz-Vergel AI. Burnout and work engagement: The JD-R Approach. *Annu Rev Organ Psychol Organ Behav*. 2014;1:389-411.
44. Rao M, Clarke A, Sanderson C, Hammersley R. Patients' own assessments of quality of primary care compared with objective records based measures of technical quality of care: Cross sectional study. *Br Med J* 2006;333:19-22.

**STROBE 2007 (v4) Statement—Checklist of items that should be included in reports of *cohort studies***

| Section/Topic                | Item # | Recommendation                                                                                                                                                                       | Reported on page # |
|------------------------------|--------|--------------------------------------------------------------------------------------------------------------------------------------------------------------------------------------|--------------------|
| <b>Title and abstract</b>    | 1      | (a) Indicate the study's design with a commonly used term in the title or the abstract                                                                                               | 1                  |
|                              |        | (b) Provide in the abstract an informative and balanced summary of what was done and what was found                                                                                  | 2-3                |
| <b>Introduction</b>          |        |                                                                                                                                                                                      |                    |
| Background/rationale         | 2      | Explain the scientific background and rationale for the investigation being reported                                                                                                 | 4                  |
| Objectives                   | 3      | State specific objectives, including any prespecified hypotheses                                                                                                                     | 4                  |
| <b>Methods</b>               |        |                                                                                                                                                                                      |                    |
| Study design                 | 4      | Present key elements of study design early in the paper                                                                                                                              | 5-6                |
| Setting                      | 5      | Describe the setting, locations, and relevant dates, including periods of recruitment, exposure, follow-up, and data collection                                                      | 5                  |
| Participants                 | 6      | (a) Give the eligibility criteria, and the sources and methods of selection of participants. Describe methods of follow-up                                                           | 5, 7               |
|                              |        | (b) For matched studies, give matching criteria and number of exposed and unexposed                                                                                                  | -                  |
| Variables                    | 7      | Clearly define all outcomes, exposures, predictors, potential confounders, and effect modifiers. Give diagnostic criteria, if applicable                                             | 5-8                |
| Data sources/<br>measurement | 8*     | For each variable of interest, give sources of data and details of methods of assessment (measurement). Describe comparability of assessment methods if there is more than one group | 5-8                |
| Bias                         | 9      | Describe any efforts to address potential sources of bias                                                                                                                            | 5-8                |
| Study size                   | 10     | Explain how the study size was arrived at                                                                                                                                            | 5                  |
| Quantitative variables       | 11     | Explain how quantitative variables were handled in the analyses. If applicable, describe which groupings were chosen and why                                                         | 6-7                |
| Statistical methods          | 12     | (a) Describe all statistical methods, including those used to control for confounding                                                                                                | 8                  |
|                              |        | (b) Describe any methods used to examine subgroups and interactions                                                                                                                  | 8                  |
|                              |        | (c) Explain how missing data were addressed                                                                                                                                          | 7                  |
|                              |        | (d) If applicable, explain how loss to follow-up was addressed                                                                                                                       | -                  |
|                              |        | (e) Describe any sensitivity analyses                                                                                                                                                | -                  |
| <b>Results</b>               |        |                                                                                                                                                                                      |                    |



|                          |     |                                                                                                                                                                                                                                                                                                                                                                                                               |                                               |
|--------------------------|-----|---------------------------------------------------------------------------------------------------------------------------------------------------------------------------------------------------------------------------------------------------------------------------------------------------------------------------------------------------------------------------------------------------------------|-----------------------------------------------|
| Participants             | 13* | (a) Report numbers of individuals at each stage of study—eg numbers potentially eligible, examined for eligibility, confirmed eligible, included in the study, completing follow-up, and analysed<br>(b) Give reasons for non-participation at each stage<br>(c) Consider use of a flow diagram                                                                                                               | 5<br>5-8<br>-                                 |
| Descriptive data         | 14* | (a) Give characteristics of study participants (eg demographic, clinical, social) and information on exposures and potential confounders<br>(b) Indicate number of participants with missing data for each variable of interest<br>(c) Summarise follow-up time (eg, average and total amount)                                                                                                                | 8-9<br>7-8<br>8                               |
| Outcome data             | 15* | Report numbers of outcome events or summary measures over time                                                                                                                                                                                                                                                                                                                                                | 8                                             |
| Main results             | 16  | (a) Give unadjusted estimates and, if applicable, confounder-adjusted estimates and their precision (eg, 95% confidence interval). Make clear which confounders were adjusted for and why they were included<br>(b) Report category boundaries when continuous variables were categorized<br>(c) If relevant, consider translating estimates of relative risk into absolute risk for a meaningful time period | 10-11 (table 3)<br>10 (table 2)<br>considered |
| Other analyses           | 17  | Report other analyses done—eg analyses of subgroups and interactions, and sensitivity analyses                                                                                                                                                                                                                                                                                                                | -                                             |
| <b>Discussion</b>        |     |                                                                                                                                                                                                                                                                                                                                                                                                               |                                               |
| Key results              | 18  | Summarise key results with reference to study objectives                                                                                                                                                                                                                                                                                                                                                      | 12                                            |
| <b>Limitations</b>       |     |                                                                                                                                                                                                                                                                                                                                                                                                               |                                               |
| Interpretation           | 20  | Give a cautious overall interpretation of results considering objectives, limitations, multiplicity of analyses, results from similar studies, and other relevant evidence                                                                                                                                                                                                                                    | 12-16                                         |
| Generalisability         | 21  | Discuss the generalisability (external validity) of the study results                                                                                                                                                                                                                                                                                                                                         | 16                                            |
| <b>Other information</b> |     |                                                                                                                                                                                                                                                                                                                                                                                                               |                                               |
| Funding                  | 22  | Give the source of funding and the role of the funders for the present study and, if applicable, for the original study on which the present article is based                                                                                                                                                                                                                                                 | 17                                            |

\*Give information separately for cases and controls in case-control studies and, if applicable, for exposed and unexposed groups in cohort and cross-sectional studies.

**Note:** An Explanation and Elaboration article discusses each checklist item and gives methodological background and published examples of transparent reporting. The STROBE checklist is best used in conjunction with this article (freely available on the Web sites of PLoS Medicine at <http://www.plosmedicine.org/>, Annals of Internal Medicine at <http://www.annals.org/>, and Epidemiology at <http://www.epidem.com/>). Information on the STROBE Initiative is available at [www.strobe-statement.org](http://www.strobe-statement.org).

# BMJ Open

## Mental well-being and job satisfaction in general practitioners in Denmark and their patients' change of general practitioner: a cohort study combining survey data and register data

|                                 |                                                                                                                                                                                                                                                                                                                                                                                                                                 |
|---------------------------------|---------------------------------------------------------------------------------------------------------------------------------------------------------------------------------------------------------------------------------------------------------------------------------------------------------------------------------------------------------------------------------------------------------------------------------|
| Journal:                        | <i>BMJ Open</i>                                                                                                                                                                                                                                                                                                                                                                                                                 |
| Manuscript ID                   | bmjopen-2019-030142.R2                                                                                                                                                                                                                                                                                                                                                                                                          |
| Article Type:                   | Original research                                                                                                                                                                                                                                                                                                                                                                                                               |
| Date Submitted by the Author:   | 01-Oct-2019                                                                                                                                                                                                                                                                                                                                                                                                                     |
| Complete List of Authors:       | Nørøxe, Karen; Research Unit for General Practice; Aarhus University, Department of Public Health<br>Vedsted, Peter; Research Unit for General Practice<br>Bro, Flemming; Research Unit for General Practice; Aarhus University, Department of Public Health<br>Carlsen, Anders; Research Unit for General Practice<br>Pedersen, Anette; Research Unit for General Practice; Aarhus University, Department of Clinical Medicine |
| <b>Primary Subject Heading</b>: | Health services research                                                                                                                                                                                                                                                                                                                                                                                                        |
| Secondary Subject Heading:      | General practice / Family practice                                                                                                                                                                                                                                                                                                                                                                                              |
| Keywords:                       | General practitioners, Burnout, Job satisfaction, Patient satisfaction, Denmark                                                                                                                                                                                                                                                                                                                                                 |
|                                 |                                                                                                                                                                                                                                                                                                                                                                                                                                 |

SCHOLARONE™  
Manuscripts

1  
2  
3 **Mental well-being and job satisfaction in general practitioners in Denmark and their patients'**  
4 **change of general practitioner: a cohort study combining survey data and register data**  
5  
6  
7  
8  
9

10  
11 Karen Busk Nørøxe<sup>1,3</sup>, Peter Vedsted<sup>1</sup>, Flemming Bro<sup>1,3</sup>, Anders Helles Carlsen<sup>1</sup>, Anette Fischer Pedersen<sup>2</sup>  
12  
13

14  
15 <sup>1</sup>Research Unit for General Practice, Aarhus, Bartholins Allé 2, 8000 Aarhus C, Denmark  
16

17 <sup>2</sup>Department of Clinical Medicine, Aarhus University, Palle Juul-Jensens Boulevard 82, 8200 Aarhus N, Denmark  
18

19 <sup>3</sup>Department of Public Health, Aarhus University, Bartholins Allé 2, 8000 Aarhus C, Denmark  
20  
21  
22  
23  
24  
25  
26  
27  
28  
29  
30  
31

32 **Corresponding author:**  
33

34 Karen Busk Nørøxe

35 Research Unit for General Practice, Aarhus & Department of Public Health, Aarhus University, Denmark  
36

37 E-mail: karen\_bn@live.dk  
38  
39  
40  
41

42 Word count, text: 3,495

43 Word count, abstract: 298

44 Number of tables: 3  
45  
46  
47  
48  
49  
50  
51  
52  
53  
54  
55  
56  
57  
58  
59  
60

## ABSTRACT

**Objectives:** Low job satisfaction and poor well-being (e.g. stress and burnout) among physicians may have negative consequences for patient experienced healthcare quality. In primary care, this could manifest in patients choosing another general practitioner (GP). The objective of this study was to examine change of GP (unrelated to change of address) among patients in relation to their GPs' job satisfaction, well-being, and self-assessed work-ability.

**Design and setting:** Data from a nationwide questionnaire survey among Danish GPs in May 2016 was combined with register data on their listed patients. Associations between patients' change of GP (COGP) in the 6-month study period (from May 2016) and the job satisfaction/well-being of their GP were estimated as risk ratios (RRs) at the individual patient level using binomial regression analysis. Potential confounders were included for adjustment.

**Participants:** The study cohort included 569,766 patients aged  $\geq 18$  years listed with 409 GPs in single-handed practices.

**Results:** COGP was significantly associated with occupational distress (burnout and low job satisfaction) in the GP. This association was seen in a dose-response like pattern. For burnout, associations were found for depersonalisation and reduced sense of personal accomplishment (but not for emotional exhaustion). The adjusted risk ratio was 1.40 (1.10-1.72) for patients listed with a GP with the lowest level of job satisfaction and 1.24 (1.01-1.52) and 1.40 (1.14-1.72) for patients listed with a GP in the most unfavourable categories of depersonalisation and sense of personal accomplishment (the most favourable categories used as reference). COGP was not associated with self-assessed work-ability or domains of well-being related to life in general.

1  
2  
3  
4  
5  
6  
7  
8  
9  
10  
11  
12  
13  
14  
15  
16  
17  
18  
19  
20  
21  
22  
23  
24  
25  
26  
27  
28  
29  
30  
31  
32  
33  
34  
35  
36  
37  
38  
39  
40  
41  
42  
43  
44  
45  
46  
47  
48  
49  
50  
51  
52  
53  
54  
55  
56  
57  
58  
59  
60

**Conclusions:** Patients' likelihood of changing GP increased with GP burnout and decreasing job satisfaction. These findings indicate that patients' evaluation of care as measured by change of GP may be influenced by their GPs' work conditions and occupational well-being.

**Keywords:** General Practitioners, Burnout, Job Satisfaction, Patient Satisfaction, Denmark

For peer review only

### Strengths and limitations of this study

- Mental well-being and job satisfaction in general practitioners (GPs) were examined in relation to a register based (rather than a self-reported) indicator of suboptimal healthcare quality.
- Mental well-being and job satisfaction were assessed by validated rating scales.
- Precise linkage of each patient with a specific GP.
- Prospective study design.
- Adjustment for several potential confounders, but observed associations could still be mediated by unmeasured factors.

### BACKGROUND

Among general practitioners (GPs) stress, burnout and job dissatisfaction is prevalent[1] and may have important implications for quality in healthcare.[2–7] Yet, existing research examining the possible consequences of physician mental well-being/satisfaction for healthcare quality predominantly rely on physician self-report.

Patient satisfaction is by itself an essential component of healthcare quality and may furthermore reflect underlying dimensions of healthcare quality important for health outcomes. Such dimension include access to care and effectiveness of clinical and interpersonal care.[8] The possible negative implications of GP distress for patients' experience and satisfaction with primary healthcare is understudied.

A change of GP that is unrelated to change of address (because of moving) may indicate dissatisfaction with the GP.[9–11] The continuous relationship with a GP is highly valued by many patients[12], and a patient's change of GP is often preceded by careful consideration.[13] Satisfaction and decision-making regarding change of GP is strongly influenced by the patient's perception of interpersonal aspects of care.[9,13–15] GPs who face stress, burnout, and low job satisfaction may compromise with the quality of provided care and exhibit reduced empathic concern for the patients.[7,16,17] Moreover, GPs with high levels of occupational distress may have longer waiting times for consultations due to excessive workloads, which could add to the

1  
2 listed patients' propensity to change GP.[9,10] Consequently, the patient-GP relationship and the patient-  
3 assessed quality may suffer, and some patients may decide to change GP.  
4  
5  
6

7 This study aimed to examine whether distress levels and self-assessed work-ability in GPs were associated  
8 with change of GP among listed patients (voluntary disenrollment) as proxy for dissatisfaction with care.  
9  
10  
11  
12  
13  
14  
15

## 16 **METHODS**

### 17 **Setting**

18 Almost all citizens in Denmark (98%) are listed with a specific general practice, which they must consult for  
19 medical advice. GPs in Denmark provide comprehensive family medicine to their listed patients and act as  
20 gatekeepers and coordinators to the rest of the tax-funded healthcare system.[18] Patients are charged a fee  
21 (approx. €26) if they change general practice unrelated to change of address. Approximately, 27% of Danish  
22 GPs are organised in single-handed practices.  
23  
24  
25  
26  
27  
28  
29  
30

### 31 **Study population**

32 In May 2016, we invited all GPs in Denmark to participate in a questionnaire survey on their working  
33 conditions and mental well-being (response rate: 50.2%). The survey has been described in detail  
34 elsewhere.[1] For the purpose of this study, only GPs in single-handed practices were included as this  
35 allowed for accurate linkage of each patient to a specific GP. Furthermore, we did not include GPs who had  
36 locum(s) employed for > 20 hours per week, GPs with < 500 listed patients, and GPs who were newcomers in  
37 their current practice (i.e. arrived in 2016).  
38  
39  
40  
41  
42  
43  
44  
45  
46  
47

48 GPs were excluded if more than 90% of the listed patients changed GP in the study period, or if more than  
49 10% of the listed patients changed GP on the same date as this indicated restructuring of the practice (N = 7).  
50  
51  
52

53 Study cases were patients aged  $\geq 18$  years who were registered in the Danish Patient List Register (PLR) with  
54 an eligible general practice at the beginning of the study period. The PLR holds information on start and end  
55 dates of all registrations of patients with all general practices in Denmark. The 6-month study period started  
56  
57  
58  
59  
60

1  
2  
3 on 1 May 2016. A total of 569,776 patients listed with 402 GPs in single-handed practices were included in  
4  
5 the analyses.  
6  
7

### 8 **Change of GP**

9  
10 A *patient's change of GP (COGP)* was defined as being listed in the PLR with a start date with a general  
11  
12 practice in the study period and no new postal address or immigration within two months on both sides of  
13  
14 the start date. Information on change of address and immigration among patients was collected from the  
15  
16 Danish Civil Registration System.  
17  
18

### 19 **GP mental well-being and job satisfaction**

20  
21 The indicators of mental well-being (general and occupational) and job satisfaction were selected a priori  
22  
23 from the GP questionnaire. The indicators were measured by validated and reliable rating scales, which have  
24  
25 previously shown adequate consistency among Danish GPs.[1] *Job satisfaction* was assessed by the Warr-  
26  
27 Cook-Wall Job Satisfaction Scale (WCW-JSS), *perceived stress in general life* by Cohen's 10-item Perceived  
28  
29 Stress Scale (PSS-10), *general well-being* by the 5-item World Health Organisation Well-Being Index (WHO-5),  
30  
31 and *burnout* by the Maslach Burnout Inventory Human-Services-Survey (MBI-HSS). The MBI-HSS consists of  
32  
33 three subscales that measure three burnout dimensions: *emotional exhaustion*, *depersonalisation*, and *sense*  
34  
35 *of personal accomplishment*. *Self-rated work-ability* was measured by a single-item of the Work Ability Index  
36  
37 (WAI); the respondents scored their current work-ability against their lifetime best on a Likert scale. This  
38  
39 single item has shown high consistency with the full scale.[19]  
40  
41  
42  
43  
44

45 We categorised *job satisfaction*, *perceived stress*, *self-rated workability*, and each burnout dimension  
46  
47 according to quartiles of the scale scores. No well-established cut-off values exist that define significant  
48  
49 positive or negative levels of these measures. Burnout is often categorised according to the cut-off value  
50  
51 based on normative frequency distributions; this approach allows for comparison of burnout symptoms over  
52  
53 time and across populations, but it does not signify clinical significance.[20] As in previous research, we  
54  
55 categorised scales according to quartiles of the sum-scores to allow for exploration of non-linear and dose-  
56  
57 response like associations with COGP.[21,22] To evaluate burnout as a multidimensional construct[20], we  
58  
59  
60



1  
2 additionally categorised burnout based on a *composite burnout score*.<sup>[22]</sup> This score was calculated by  
3  
4 adding up points corresponding to the quartile of each subscale (reversed score for personal  
5  
6 accomplishment); 1 point was assigned for subscale scores in the first quartile, and 2, 3 and 4 points were  
7  
8 assigned for scores in the second, third and fourth quartiles, respectively. The composite score was  
9  
10 categorised into five groups: 3-4 points (corresponding to low burnout levels on all subscales), 5-6 points, 7-8  
11  
12 points, 9-10 points, and 11-12 points (corresponding to high burnout levels on all subscales). Finally, *general*  
13  
14 *well-being* was categorised as 'poor' for a scale score of  $\leq 50$  (the recommended cut-off value when using the  
15  
16 WHO-5 for screening for depression), 'good' for a score of  $>70$ , and 'moderate' for a score in between.<sup>[1]</sup>  
17  
18  
19  
20

## 21 **Covariates**

22  
23 Potential confounders were selected a priori for adjustment. At GP level, information on gender and seniority  
24  
25 (years since qualification as a GP:  $\leq 5$ , 6-15, 16-25, or  $\geq 25$ ) was obtained from the questionnaire survey. At  
26  
27 patient level, information on each patient's demographic and socioeconomic characteristics was obtained  
28  
29 from Statistics Denmark.<sup>[23]</sup> This information included gender, age group at the beginning of the study  
30  
31 period (18-29, 30-39, 40-49, 50-59, 60-69, 70-79, or  $\geq 80$  years), marital status (married/cohabiting or living  
32  
33 alone), ethnic origin (Dane or immigrant/descendent), degree of urbanisation (rural area:  $< 1,000$   
34  
35 inhabitants, small city: 1,000-19,999 inhabitants, medium city: 20,000-99,999 inhabitants, or large city:  $>$   
36  
37 1,000,000 inhabitants), OECD-modified household income (categorised in pentiles), highest attained  
38  
39 educational level (low:  $\leq 10$  years, medium: 11-15 years, or high:  $> 15$  years), work affiliation (*in the labour*  
40  
41 *force*: employed and students, *outside the labour force*: unemployed, early retirement pensioner, personal or  
42  
43 sick leave, or *retired*).

44  
45  
46  
47  
48 Multimorbidity in patients was assessed by Charlson's Comorbidity Index (CCI) score (0, 1, 2, or  $\geq 3$ ), which  
49  
50 was calculated on the basis of the diagnoses registered in the Danish National Patient Register in 2006-  
51  
52 2015.<sup>[24]</sup> Finally, the percentage of general practices closed for intake of new patients in the patients'  
53  
54 municipality in 2016 ( $< 60\%$ , 60-80%, or  $> 80\%$ ) was included as a covariate obtained from the Organisation  
55  
56 of General Practitioners in Denmark<sup>[25]</sup> because the patient's option to change general practice depends on  
57  
58  
59  
60

1  
2 the availability of alternative practices.[9] GPs are generally allowed to close for intake of new patients when  
3  
4 their list size exceeds 1,600 patients per GP.  
5  
6

7 Information on socioeconomic characteristics was obtained for 2015. Missing information on educational  
8  
9 level (5.9%) was categorised as unknown. Patients with missing information on any other covariates were  
10  
11 excluded (N = 5.213 (0.9%)). Each patient was linked to the GP-related data through the GP's provider  
12  
13 number.[1] At patient level, the data were linked through the CRN; a unique personal identification number  
14  
15 assigned to all citizens in Denmark.[26] All personal identifiers were encrypted prior to analysis.[1]  
16  
17  
18

## 19 **Analyses**

20  
21 We calculated the share of patients with COGP and the corresponding 95% confidence interval (CI).  
22  
23 Associations between each of the included GP well-being indicators and COGP among patients were  
24  
25 calculated at the individual patient level by use of binomial regression analyses. The most favourable  
26  
27 category of the indicator examined was used as reference. Unadjusted and adjusted analyses were carried  
28  
29 out using robust variance estimation to account for clusters of patients at practice level. Adjusted models  
30  
31 included share of practices closed for new patient uptake in the municipality, GP factors (gender and  
32  
33 seniority) and patient factors (gender, age, marital status, ethnicity, city size, income, length of education,  
34  
35 work affiliation, comorbidity) in the categories described above.  
36  
37  
38  
39

40  
41 Prior to these analyses, we tested that the mean time at risk of COGP per listed patient did not vary across  
42  
43 the GP well-being/satisfaction categories. Patients were considered to be at risk until death, immigration, or  
44  
45 change of general practice for any reason.  
46  
47

48 A p-value of  $\leq 0.05$  was considered statistically significant. Analyses were performed using Stata, version 15.  
49  
50

## 51 **Patient and public involvement**

52  
53 This research was done without patient or public involvement.  
54  
55  
56  
57

## 58 **RESULTS**

During the 6-month study period, we identified 6,648 (1.17%) cases of COGP among the included patients (i.e. change of GP without change of address). The characteristics of the study cohort (N = 569,776) and the share of patients with COGP are shown in Table 1.

**Table 1.** Patient characteristics according to COGP in the 6-month study period.

|                                                                |                          | All patients<br>N (%) | Patients with COGP<br>n per 1000 (95%CI) |
|----------------------------------------------------------------|--------------------------|-----------------------|------------------------------------------|
| <b>Total</b>                                                   |                          | 569,776 (100)         | 11.7 (11.4-11.9)                         |
| <b>Gender</b>                                                  | Female                   | 287,097 (50.4)        | 13.1 (12.7-13.6)                         |
|                                                                | Male                     | 282,679 (49.6)        | 10.2 (9.8-10.5)                          |
| <b>Age group, years</b>                                        | 18 – 29                  | 116,342 (20.4)        | 15.5 (14.8-16.2)                         |
|                                                                | 30 – 39                  | 85,453 (15.0)         | 13.7 (12.9-14.4)                         |
|                                                                | 40 – 49                  | 96,114 (16.8)         | 11.1 (10.4-11.7)                         |
|                                                                | 50 – 59                  | 94,716 (16.6)         | 9.5 (8.9-10.1)                           |
|                                                                | 60 – 69                  | 83,667 (14.7)         | 9.1 (8.5-9.8)                            |
|                                                                | 70 – 79                  | 61,533 (10.8)         | 10.1 (9.3-10.9)                          |
|                                                                | ≥ 80                     | 31,951 (5.6)          | 10.3 (9.3-10.9)                          |
| <b>Marital status</b>                                          | Married / cohabiting     | 343,049 (60.2)        | 11.5 (11.1-11.9)                         |
|                                                                | Living alone             | 226,727 (39.8)        | 11.9 (11.5-12.4)                         |
| <b>Ethnicity</b>                                               | Danish                   | 491,661 (86.3)        | 11.4 (11.1-11.8)                         |
|                                                                | Immigrant/descendant     | 78,115 (13.7)         | 13.1 (12.3-13.8)                         |
| <b>Education, years</b>                                        | ≤ 10                     | 142,070 (24.9)        | 12.5 (11.9-13.1)                         |
|                                                                | 11-15                    | 227,689 (40.0)        | 10.8 (10.4-11.3)                         |
|                                                                | > 15                     | 166,644 (29.2)        | 11.8 (11.3-12.4)                         |
|                                                                | Unknown                  | 33,373 (5.9)          | 12.9 (11.8-14.2)                         |
| <b>Work affiliation</b>                                        | In the labour force      | 356,016 (62.5)        | 11.4 (11.0-11.8)                         |
|                                                                | Outside the labour force | 85,620 (15.3)         | 15.3 (14.5-16.2)                         |
|                                                                | Retired                  | 128,140 (22.5)        | 9.9 (9.4-10.5)                           |
| <b>OECD-modified household income, pentiles</b>                | 1 <sup>st</sup> (low)    | 113,956 (20.0)        | 13.3 (12.7-14.0)                         |
|                                                                | 2 <sup>nd</sup>          | 113,955 (20.0)        | 12.8 (12.2-13.5)                         |
|                                                                | 3 <sup>rd</sup>          | 113,957 (20.0)        | 11.5 (10.9-12.1)                         |
|                                                                | 4 <sup>th</sup>          | 113,953 (20.0)        | 10.5 (9.9-11.0)                          |
|                                                                | 5 <sup>th</sup> (high)   | 113,955 (20.0)        | 10.2 (9.7-10.8)                          |
| <b>Multimorbidity index score</b>                              | 0                        | 460,769 (80.9)        | 11.7 (11.4-12.1)                         |
|                                                                | 1                        | 52,485 (9.2)          | 11.6 (10.8-12.6)                         |
|                                                                | 2                        | 31,899 (5.6)          | 11.0 (9.8-12.1)                          |
|                                                                | ≥ 3                      | 24,633 (4.3)          | 11.2 (10.0-12.6)                         |
| <b>Practices closed for patient intake in the municipality</b> | < 60%                    | 264,254 (46.4)        | 12.1 (11.7-12.6)                         |
|                                                                | 60-80%                   | 200,187 (35.1)        | 12.1 (11.6-12.6)                         |
|                                                                | > 80%                    | 105,335 (18.5)        | 9.7 (9.1-10.3)                           |
| <b>City size</b>                                               | Rural area               | 89,014 (15.6)         | 10.8 (10.1-11.5)                         |
|                                                                | Small city               | 137,286 (24.1)        | 11.7 (11.1-12.3)                         |
|                                                                | Medium city              | 88,920 (15.6)         | 11.4 (10.7-12.1)                         |
|                                                                | Large city               | 254,556 (44.7)        | 12.1 (11.4-12.5)                         |
| <b>Duration of GP-patient relationship</b>                     | < 2 years                | 139,880 (24.6)        | 17.4 (16.7-18.1)                         |
|                                                                | 2 - 8 years              | 203,640 (35.7)        | 12.1 (11.7-12.6)                         |
|                                                                | > 8 years                | 226,256 (39.7)        | 7.7 (7.4-8.1)                            |

COGP: change of general practitioner without change of address.

Table 2 displays GP characteristics and well-being.

**Table 2.** Description of the GPs included in the study (N = 402)

| <b>GP and practice characteristics</b>                       |                  |
|--------------------------------------------------------------|------------------|
| <b>Gender, n (%)</b>                                         |                  |
| Female                                                       | 178 (44.3)       |
| Male                                                         | 224 (55.7)       |
| <b>Age, years; mean (SD)</b>                                 | 56.4 (8.4)       |
| <b>Years since qualification as a GP, mean (SD)</b>          | 18.9 (9.4)       |
| <b>List size, median (IQR)</b>                               | 1693 (1544-1935) |
| <b>COGP per 1000 listed patients, median (IQR); range</b>    | 9.4 (5.9-14.7)   |
| <b>Well-being and satisfaction</b>                           |                  |
| <b>Job satisfaction score (WCW-JSS), median (IQR)</b>        | 50 (40-58)       |
| <b>Emotional exhaustion score (MBI-HSS), median (IQR)</b>    | 20 (13-28)       |
| <b>Depersonalisation score (MBI-HSS), median (IQR)</b>       | 5 (3-8)          |
| <b>Personal accomplishment score (MBI-HSS), median (IQR)</b> | 35 (31-38)       |
| <b>Composite burnout score, n (%)</b>                        |                  |
| 3-4 (low)                                                    | 75 (18.7)        |
| 5-6                                                          | 80 (19.9)        |
| 7-8                                                          | 93 (23.1)        |
| 9-10                                                         | 93 (23.1)        |
| 11-12 (high)                                                 | 61 (15.2)        |
| <b>Perceived general stress score (PSS-10), median (IQR)</b> | 12 (8-17)        |
| <b>General well-being (WHO-5)</b>                            |                  |
| Good (score >70)                                             | 121 (30.6)       |
| Moderate                                                     | 197 (49.7)       |
| Poor (score ≤ 50)                                            | 78 (19.7)        |
| <b>Self-assessed work-ability, n (%)</b>                     |                  |
| Score 10 (best)                                              | 81 (20.4)        |
| Score 9                                                      | 122 (30.8)       |
| Score 8                                                      | 111 (28.0)       |
| Score 7                                                      | 82 (20.7)        |

IQR: interquartile interval. COGP: Change of general practitioner without change of address. WCW-JSS: Warr-Cook-Wall Job Satisfaction Scale. MBI-HSS: Maslach Burnout Inventory Human-Services-Survey. PSS-10: Cohens Perceived Stress Scale. WHO-5: World Health Organisation Well-Being Index.

Note: Number of GPs varies due to partial response to the questionnaire for six GPs.

Table 3 shows the results of the regression analyses.

**Table 3.** Patients' COGP in relation to GP's job satisfaction, well-being, and self-assessed work-ability

|  | RR (95% CI) | adj. RR* (95% CI) |
|--|-------------|-------------------|
|  |             |                   |

|                                            |                         |                         |
|--------------------------------------------|-------------------------|-------------------------|
| <b>Job satisfaction</b> (quartiles)        |                         |                         |
| 4 <sup>th</sup> (high)                     | 1.00                    | 1.00                    |
| 3 <sup>rd</sup>                            | 1.08 (0.87-1.33)        | 1.08 (0.88-1.32)        |
| 2 <sup>nd</sup>                            | 1.21 (0.98-1.49)        | <b>1.21 (1.01-1.48)</b> |
| 1 <sup>st</sup> (low)                      | <b>1.36 (1.08-1.71)</b> | <b>1.40 (1.10-1.72)</b> |
| <b>Emotional exhaustion</b> (quartiles)    |                         |                         |
| 1 <sup>st</sup> (low)                      | 1.00                    | 1.00                    |
| 2 <sup>nd</sup>                            | 1.00 (0.80-1.25)        | 1.05 (0.85-1.31)        |
| 3 <sup>rd</sup>                            | 0.88 (0.72-1.09)        | 0.92 (0.76-1.13)        |
| 4 <sup>th</sup> (high)                     | 1.03 (0.31-1.28)        | 1.04 (0.86-1.27)        |
| <b>Depersonalisation</b> (quartiles)       |                         |                         |
| 1 <sup>st</sup> (low)                      | 1.00                    | 1.00                    |
| 2 <sup>nd</sup>                            | 1.15 (0.94-1.42)        | 1.18 (0.98-1.44)        |
| 3 <sup>rd</sup>                            | 1.15 (0.93-1.43)        | 1.22 (0.99-1.50)        |
| 4 <sup>th</sup> (high)                     | 1.21 (0.98-1.50)        | <b>1.24 (1.01-1.52)</b> |
| <b>Personal accomplishment</b> (quartiles) |                         |                         |
| 1 <sup>st</sup> (high)                     | 1.00                    | 1.00                    |
| 2 <sup>nd</sup>                            | 1.10 (0.88-1.37)        | 1.13 (0.91-1.39)        |
| 3 <sup>rd</sup>                            | <b>1.27 (1.06-1.52)</b> | <b>1.34 (1.12-1.59)</b> |
| 4 <sup>th</sup> (low)                      | <b>1.36 (1.09-1.69)</b> | <b>1.40 (1.14-1.72)</b> |
| <b>Composite burnout score</b>             |                         |                         |
| 3-4 (low)                                  | 1.00                    | 1.00                    |
| 5-6                                        | 1.16 (0.92-1.47)        | 1.15 (0.92-1.44)        |
| 7-8                                        | <b>1.24 (1.00-1.53)</b> | <b>1.30 (1.06-1.58)</b> |
| 9-10                                       | <b>1.30 (1.05-1.61)</b> | <b>1.38 (1.12-1.71)</b> |
| 11-12 (high)                               | 1.22 (0.96-1.56)        | 1.21 (0.96-1.52)        |
| <b>Perceived stress</b> (quartiles)        |                         |                         |
| 1 <sup>st</sup> (low)                      | 1.00                    | 1.00                    |
| 2 <sup>nd</sup>                            | 1.01 (0.82-1.24)        | 1.04 (0.86-1.25)        |
| 3 <sup>rd</sup>                            | 1.13 (0.90-1.42)        | 1.17 (0.93-1.46)        |
| 4 <sup>th</sup> (high)                     | 0.99 (0.82-1.20)        | 0.96 (0.80-1.15)        |
| <b>General well-being</b>                  |                         |                         |
| Good                                       | 1.00                    | 1.00                    |
| Moderate                                   | 1.06 (0.89-1.27)        | 1.07 (0.89-1.27)        |
| Poor                                       | 1.02 (0.83-1.25)        | 1.01 (0.82-1.24)        |
| <b>Self-assessed work-ability</b>          |                         |                         |
| 4 <sup>th</sup> (high)                     | 1.00                    | 1.00                    |
| 3 <sup>rd</sup>                            | 0.94 (0.75-1.17)        | 0.98 (0.79-1.22)        |
| 2 <sup>nd</sup>                            | 1.09 (0.86-1.38)        | 1.13 (0.91-1.42)        |
| 1 <sup>st</sup> (low)                      | 0.92 (0.73-1.15)        | 0.92 (0.74-1.15)        |

COGP: change of general practitioner without change of address. RR: risk ratio.

\*adjusted for patient age, gender, socioeconomic factors, multimorbidity, city size, duration of GP-patient relationship and percentage of practices closed for patient intake in the municipality (categorised as presented in Table 1) and for GP seniority and gender.

**Bold** indicates significant results ( $p \leq 0.05$ ).

The likelihood of COGP increased with depersonalisation, diminishing sense of personal accomplishment, and decreasing job satisfaction in the GP with whom the patient was listed. The adjusted RR was 1.40 (1.10-1.72)

1  
2 for patients listed with a GP with the lowest level of job satisfaction and 1.24 (1.01-1.52) and 1.40 (1.14-1.72)  
3  
4 for patients listed with a GP in the most unfavourable categories of the burnout dimensions  
5  
6  
7 depersonalisation and sense of low personal accomplishment.  
8  
9

10 Likewise, COGP tended to increase with a higher composite burnout score, although a small decline was seen  
11  
12 at the highest level of burnout. Yet, the emotional exhaustion dimension of burnout was not associated with  
13  
14 COPG. Likewise, no associations were found for perceived stress, general well-being, or self-assessed work-  
15  
16 ability.  
17  
18  
19  
20  
21

## 22 **DISCUSSION**

### 23 **Main findings**

24  
25 Patients' likelihood of changing GP increased with decreasing job satisfaction in the GP with whom they were  
26  
27 listed. Likewise, patients listed with a GP with high levels of depersonalisation, feelings of low personal  
28  
29 accomplishment, or a high composite burnout score were more likely to change GP compared to patients  
30  
31 listed with a GP with low burnout scores. Notably, these relationships had a dose-response pattern, although  
32  
33 a small decrease was seen for the highest composite burnout level. In contrast, COGP was unrelated to  
34  
35 emotional exhaustion, perceived stress, general well-being, and self-assessed work-ability in the GP.  
36  
37  
38  
39  
40

### 41 **Strengths and limitations**

42  
43 Major strengths of this study include the large sample size and the precise linkage of each patient to an  
44  
45 individual GP by the combining of register-based data and survey data. The Danish national registers provide  
46  
47 highly valid data.[26] The survey data covered multiple distinct and yet interrelated aspects of GP well-being,  
48  
49 which was measured by validated and reliable assessment scales. The categorisation of all variables were  
50  
51 performed according to predetermined procedures. The sample size allowed us to rank GP well-being  
52  
53 indicators using multiple categories, which enabled exploration of non-linear and dose-response like  
54  
55 associations. Still, the categorisation might not distinguish the level of poor well-being that may affect the  
56  
57  
58  
59  
60

1  
2 patient-experienced quality of care. The restriction of the study period to 6 months reduced the risk of  
3  
4  
5 fluctuations in the mental state of the GP during the study period.  
6

7 We assessed GP well-being prior to COGP and the GPs were unaware of the collection of data on COGP. Still,  
8  
9 we cannot rule out that caring for a patient population with a high propensity to change GP could affect GP  
10  
11 well-being.  
12

13  
14 We used COGP as a proxy for dissatisfaction with the GP. The literature support COGP as a valid indicator of  
15  
16 patient-assessed quality.[9–11] Still, other explanation than dissatisfaction with GP care may account for  
17  
18 some patients' COGP. Moreover, patients change GP after careful consideration; some may even stay with  
19  
20 their GP even if they are dissatisfied and have a poor relationship with their GP.[9,13,14] COGP is a rare  
21  
22 event (1.17% of patients in the study) and may capture only major dissatisfaction while leaving minor  
23  
24 dissatisfaction undetected. These matters impair the use of COGP as a proxy for patient satisfaction and  
25  
26 could result in an underestimation of the influence of GP-related factors on patient satisfaction. In addition,  
27  
28 not all patients consult their GP on a regular basis, which could leave some of the study cases 'unexposed' to  
29  
30 their GP, which may also increase the risk of an underestimation.  
31  
32  
33

34  
35 Factors beyond the control of the GP may affect patients' COGP and could thus confound the results if  
36  
37 inadequately controlled for. First, patient factors are important determinants of COGP, and bias related to  
38  
39 patient characteristics may occur. For instance, complex healthcare needs in patients may relate to GP  
40  
41 distress[27] as well as to patients' propensity to change GP. As seen from Table 1, patients inclined to COGP  
42  
43 seem to include patients who were more likely to consult with complex healthcare needs (e.g. patients  
44  
45 outside the labour force) and patients who were less inclined to consult with complex needs (e.g. younger  
46  
47 people). Overall, the role of case-mix of patients is complex and may confound the results in both directions.  
48  
49 Next, the likelihood of COGP in response to poor care may decrease with the availability of alternative  
50  
51 practices locally. A high number of practices closed for patient intake may reflect workforce shortage, which  
52  
53 may be associated with increased levels of GP workload and occupational distress.[28] Therefore, we  
54  
55 adjusted for a lack of alternative practices. If inadequately adjusted for, this would most likely result in an  
56  
57 underestimation of the observed relationship between GP distress and COGP in patients. Additionally,  
58  
59  
60

1  
2 unmeasured characteristics of the GPs and their clinics (e.g. personality, clinical skills, and work conditions)  
3  
4 could confound the results. Overall, we adjusted for several potential confounders and we believe that  
5  
6 unmeasured confounding is unlikely to fully account for the observed associations.  
7  
8  
9

10 The study population was restricted to patients listed with GPs in single-handed practices who responded to  
11  
12 the survey, which could impair generalisability of findings. Yet, we have no reason to assume that the  
13  
14 associations examined depended on the GPs' approach to participation or on the type of practice. The  
15  
16 prevalence of burnout and low job satisfaction was the same for GPs in single-handed practices and GPs in  
17  
18 partnership practices.[1]  
19

### 22 **Comparison with the literature**

23  
24 To our knowledge, only one previous study has explored the possible impact of physician well-  
25  
26 being/satisfaction on patients' evaluation of healthcare by using change of GP among patients as an indicator  
27  
28 of dissatisfaction with care.[29] Lower levels of job satisfaction were associated with a higher propensity to  
29  
30 change GP in patients with pain, whereas no such relationship was seen in patients with depression. For both  
31  
32 patient groups, however, patients of physicians with greater job satisfaction reported greater levels of trust  
33  
34 and confidence in their physician.[29] In line with our findings, the existing body of research suggests that  
35  
36 higher levels of job satisfaction in physicians induce higher levels of patient satisfaction[30] and better  
37  
38 patient-physician relationships.[7]  
39

40  
41  
42 For burnout, the results of a recent review and meta-analysis examining the potential implications of  
43  
44 physician burnout on patient-assessed quality were in accordance with our findings; depersonalisation and  
45  
46 low sense of personal accomplishment were both significantly associated with reduced patient-reported  
47  
48 satisfaction, whereas emotionally exhaustion was not.[6] Several reviews support that physician burnout  
49  
50 may reduce the patient-assessed quality of care, but they also point to the need for further research.[2–4,6]  
51  
52  
53

54 There is consistent evidence that the patient's perception of the GP-patient relationship is an important  
55  
56 determinant of patient satisfaction[31–33] and that interpersonal aspects of care strongly influence the  
57  
58 decision-making regarding COGP. Not feeling recognised by the GP, poor communication, and lack of  
59  
60



1  
2 confidence and trust in the GP have been identified as important drivers in patients' decision to change  
3  
4 GP.[9,13–15].

5  
6  
7 Empirical research examining the potential impact of GP burnout and job satisfaction on interpersonal  
8  
9 aspects of care is sparse, but theoretically, it is plausible that interpersonal aspects of care mediate the  
10  
11 observed associations between occupational distress and COGP. Burnout has been described as an erosion  
12  
13 of engagement initiated by loss of internal resources as a response to chronic job-related stress.[20] A  
14  
15 suggested consequence of burnout is a hesitation to invest resources in the job as an attempt to protect  
16  
17 against further resource depletion.[16] Hence, burned out GPs may be inclined to invest less in the  
18  
19 relationship with their patients. Depersonalisation refers to the development of an emotional detachment to  
20  
21 people related to work and involves lack of compassion and a cynical attitude towards patients.  
22  
23

24  
25  
26 Albeit reverse causality cannot be excluded, one study found that GPs with higher levels of job satisfaction  
27  
28 asked more psychosocial questions and showed more affective communication.[34] Other studies found that  
29  
30 GPs with lower sense of personal accomplishment used less affective communication and were less patient-  
31  
32 centred[35] and that patients listed with more depersonalised and emotionally exhausted GPs were less  
33  
34 satisfied with the consultations with their GP.[36] However, other studies found no indications that burnout  
35  
36 or job dissatisfaction impaired the quality of interpersonal care.[37–39] Some of these differences may be  
37  
38 attributable to different burnout definitions.  
39  
40

41  
42 It may seem contradictory that emotional exhaustion was not associated with COGP, while clear associations  
43  
44 were found for the remaining two burnout components and for job satisfaction. Different explanations may  
45  
46 account for this. Firstly, the influence of burnout on job performance may depend on the stage of  
47  
48 burnout.[3,40] In the initial stage, emotional exhaustion may be the only symptom and by overstretching  
49  
50 themselves GPs may compensate for the potential negative effects of adverse work conditions on patient  
51  
52 care.[41,42] Moreover, high conscientiousness could be a risk factor for burnout. Thus, emotionally  
53  
54 exhausted GPs may exhibit high levels of thoroughness and attentiveness to patients' needs in clinical  
55  
56 encounters, and hence their patients may experience excellent care.[3,38,42] In later stages of burnout,  
57  
58 carelessness and disengagement may become more dominant. This possible mix of excellent care provision  
59  
60

1  
2 and compromised care provision in emotionally exhausted GPs may counterbalance each other in the  
3  
4 analysis. The finding that the frequency of COGP tended to increase with the composite burnout score could  
5  
6 supports this, as higher composite scores are likely to reflect later stages of burnout. Secondly, as for the  
7  
8 traditional cut-off levels of burnout, our categorisation of emotional exhaustion might not be suitable for  
9  
10 identifying the level of exhaustion that causes functional impairment. A too low cut-off value could attenuate  
11  
12 measured relationships.[3] Lastly, personal and professional values and attitudes that predispose to  
13  
14 depersonalisation, low sense of personal accomplishment, and dissatisfaction could influence clinical  
15  
16 practice.[43] Hence, the observed associations might reflect underlying attributes of the GP.

17  
18  
19  
20  
21 While COGP was associated with work-specific aspects of well-being, no associations were found for well-  
22  
23 being measures related to life in general. This suggests that job-related factors are most essential in the  
24  
25 relationship between provider well-being and patient-assessed quality of care. Yet, the actual work  
26  
27 conditions (and not only the GPs' affective response to them) may play a causal role in this relationship. For  
28  
29 instance, GPs with higher workloads may have longer waiting times and shorter consultations, which could  
30  
31 cause some patients to change GP.[9,10]

32  
33  
34  
35 COGP among patients was not associated with the self-reported work-ability among GPs. Previously, we  
36  
37 found lower self-reported work-ability as well as poor well-being in GPs to be associated with a higher rate of  
38  
39 potentially preventable hospitalisations in listed patients, which could indicate suboptimal primary  
40  
41 healthcare provision.[22] In the assessment of work-ability, GPs may attach much importance to more bio-  
42  
43 medical aspects of care, such as the ability to diagnose and provide treatment according to the best medical  
44  
45 standards. Most patients may not be qualified to judge such aspects and tend to focus more on the  
46  
47 interpersonal aspects of care in their overall evaluation of quality.[44]

## 51 **Implications**

52  
53  
54 The study findings imply that GPs' occupational well-being and job satisfaction influence patient satisfaction  
55  
56 measured as COGP. Hence, improving job satisfaction and engagement and combating burnout may improve  
57  
58 patient-assessed quality of care.  
59  
60

1  
2 The possible implications are highly important: GP distress is prevalent, and COGP among patients may  
3 reflect serious aspects of care quality. This lend support for the conception that attention should be paid to  
4 the work conditions and the well-being of healthcare providers in the pursuit of optimal healthcare.  
5  
6  
7  
8  
9 However, more research is needed to establish the connection between GP well-being and healthcare  
10 provision.  
11  
12  
13  
14  
15

## 16 **Conclusion**

17  
18 We found that patients' likelihood of changing GP increased with decreasing GP job satisfaction and  
19 increasing GP burnout. We found no association between COGP among patients and emotional exhaustion in  
20 the GP, whereas depersonalisation and reduced sense of personal accomplishment both increased the  
21 likelihood of COGP. Overall, the findings suggest that the degree to which the GP thrives in the job  
22 influences the patient assessed quality of care provided.  
23  
24  
25  
26  
27  
28  
29  
30  
31

## 32 **DECLARATIONS**

### 33 **Authors' contributions**

34  
35 All authors contributed substantially to the design of the study. KBN performed the statistical analyses in  
36 consultation with AHC. KBN wrote the first draft of the article. AFP, FB, PV, and AHC assisted in writing and  
37 revising the manuscript. All authors read and approved the final manuscript.  
38  
39  
40  
41  
42  
43  
44  
45  
46  
47

### 48 **Funding**

49  
50 This work was supported by the Danish National Research Foundation for Primary Care and by the Health  
51 Foundation. The funding bodies had no role in the conduction of the study or in the writing of the  
52 manuscript.  
53  
54  
55  
56  
57  
58

### 59 **Competing interests**

1  
2  
3 The authors declare that they have no competing interests.  
4  
5  
6

### 7 **Ethics approval**

8  
9 The project was approved by the Danish Data Protection Agency (J.no. 2016–41-4648). According to Danish  
10 law, approval by the Danish National Committee on Health Research Ethics was not required as no  
11 biomedical intervention was performed. Respondents gave their consent to participate by responding to the  
12 questionnaire. Personally identifiable information on GPs and patients were re-coded and anonymised at  
13 Statistics Denmark prior to data analysis.  
14  
15  
16  
17  
18  
19  
20  
21  
22

### 23 **Availability of data and materials**

24 Danish data protection regulations prohibit disclosure of data to any third party without prior permission  
25 from the Danish Data Protection Agency. Thus, the data from this study cannot be made publicly available.  
26  
27  
28  
29  
30  
31  
32  
33  
34  
35  
36  
37  
38  
39  
40  
41  
42  
43  
44  
45  
46  
47  
48  
49  
50  
51  
52  
53  
54  
55  
56  
57  
58  
59  
60

**REFERENCES**

1. Nørøxe KB, Pedersen AF, Bro F, Vedsted P. Mental well-being and job satisfaction among general practitioners: a nationwide cross-sectional survey in Denmark. *BMC Family Practice*. 2018;19(1)1.
2. West CP, Dyrbye LN, Shanafelt TD. Physician burnout: contributors, consequences and solutions. *J Intern. Med*. 2018;283:516-529.
3. Rathert C, Williams ES, Linhart H. Evidence for the quadruple aim. *Med Care*. 2018;56:976–84.
4. Dewa CS, Loong D, Bonato S, Trojanowski L, Rea M. The relationship between resident burnout and safety-related and acceptability-related quality of healthcare: A systematic literature review. *BMC Med Educ*. 2017;17(1):195.
5. Hall LH, Johnson J, Watt I, Tsipa A, Connor DBO. Healthcare staff wellbeing , burnout, and patient safety: A systematic review. *PLoS One*. 2016;11(7).
6. Panagioti M, Geraghty K, Johnson J, Zhou A, Panagopoulou E, Chew-Graham C, et al. Association between physician burnout and patient safety, professionalism, and patient satisfaction: A systematic review and meta-analysis. *JAMA Intern Med*. 2018;178:1317–30.
7. Williams ES, Skinner AC. Outcomes of physician job satisfaction: a narrative review, implications, and directions for future research. *Health Care Manage Rev*. 2015;28:119–39.
8. Campbell SM, Roland MO, Buetow SA. Defining quality of care. *Soc Sci Med*. 2000;51(11):1611-25.
9. Nagraj S, Abel G, Paddison C, Payne R, Elliott M, Campbell J, Roland M. Changing practice as a quality indicator for primary care: Analysis of data on voluntary disenrollment from the English GP Patient Survey. *BMC Fam Pract*. 2013;14:89.
10. Gandhi IG, Parle JV, Greenfield SM, Gould S. A quality investigation into why patients change their GPs. *Fam Pract*. 1997;14(1):49-57.
11. Grooss K, Hjertholm P, Carlsen AH, Vedsted P. Patients with cancer and change of general practice: A Danish population-based cohort study. *Br J Gen Pract*. 2016;66:e491–8.
12. Salisbury C, Sampson F, Ridd M, Montgomery AA. How should continuity of care in primary health care be assessed? *Br J Gen Pract*. 2009;59:276–82.
13. Frederiksen HB, Kragstrup J, Dehlholm-Lambertsen B. Attachment in the doctor-patient relationship in general practice: A qualitative study. *Scand. J Prim Health Care*. 2010;28:185–90.
14. Frederiksen HB, Kragstrup J, Dehlholm-Lambertsen G. It's all about recognition! Qualitative study of the value of interpersonal continuity in general practice. *BMC Fam Pract*. 2009;10:1–8.
15. Federman AD, Cook EF, Phillips RS, Puopola AL, Haas JS, Brennan TA, et al. Intention to discontinue care among primary care patients: Influence of physician behavior and process of care. *J Gen Intern Med*. 2001;16:668–74.

16. Halbesleben JRB, Rathert C. Linking physician burnout and patient outcomes. *Health Care Manage Rev.* 2008;33:29–39.
17. Maslach C, Wilmar BS, Leiter MP. Job burnout. *Annu Rev Psychol.* 2001;52:397-422.
18. Pedersen KM, Andersen JS, Sondergaard J. General Practice and Primary Health Care in Denmark. *J Am Board Fam Med.* 2012;25:34–8.
19. Ahlstrom L, Grimby-Ekman A, Hagberg M, Dellve L. The work ability index and single-item question: Associations with sick leave, symptoms, and health - A prospective study of women on long-term sick leave. *Scand J Work Environ Heal.* 2010;36:404–12.
20. Schaufeli WB, Leiter MP, Maslach C, Michael PL, Christina M. Burnout: 35 years of research and practice. *Career Dev Int.* 2009;14:204–20.
21. Pedersen AF, Sørensen JK, Bruun NH, Christensen B, Vedsted P. Risky alcohol use in Danish physicians: Associated with alexithymia and burnout? *Drug Alcohol Depend.* Elsevier Ireland Ltd; 2016;160:119–26.
22. Nørøxe KB., Pedersen AF, Carlsen AH, Bro F, Vedsted P. Mental well-being, job satisfaction, and self-rated workability in general practitioners and hospitalisations for ambulatory care sensitive conditions among listed patients: a cohort study combining survey data on GPs and register data on patients. *BMJ Qual Saf;* 2019.
23. Statistics Denmark. <https://www.dst.dk/en/Statistik/dokumentation>. Accessed 20 Aug 2018.
24. Thygesen SK, Christiansen CF, Christensen S, Lash TL, Sørensen HT. The predictive value of ICD-10 diagnostic coding used to assess Charlson comorbidity index conditions in the population-based Danish National Registry of Patients. *BMC Med Res Methodol.* 2011;11:83.
25. PLO analyse. Praksis med lukket for tilgang [Practices closed for intake of patients], 2016. Available from: [https://www.laeger.dk/sites/default/files/plo\\_analyse\\_praksis\\_lukket\\_med\\_tilgang.pdf](https://www.laeger.dk/sites/default/files/plo_analyse_praksis_lukket_med_tilgang.pdf). Accessed 20 Aug 2018.
26. Pedersen CB. The Danish civil registration system. *Scand J Public Health* 2011;39(7):22-5.
27. Pedersen AF, Vedsted P. Understanding the inverse care law: a register and survey-based study of patient deprivation and burnout in general practice. *Int J Equity Health.* 2014;13:121.
28. Marchand C, Peckham S. Addressing the crisis of GP recruitment and retention: A systematic review. *Br J Gen Pract.* 2017;67(657).
29. Grembowski D, Paschane D, Diehr P, Katon W, Martin D, Patrick DL. Managed care, physician job satisfaction, and the quality of primary care. *J Gen Intern Med.* 2005;20:271–7.
30. Scheepers RA, Boerebach BCM, Arah OA, Heineman MJ, Lombarts KMJM. A systematic review of the impact of physicians' occupational well-being on the quality of patient care. *Int J Behav Med.* 2015;22:683–98.
31. Vedsted P, Heje HN. Association between patients' recommendation of their GP and their evaluation of the GP. *Scand J Prim Health Care.* 2008;26:228–34.

1  
2  
3  
4  
5  
6  
7  
8  
9  
10  
11  
12  
13  
14  
15  
16  
17  
18  
19  
20  
21  
22  
23  
24  
25  
26  
27  
28  
29  
30  
31  
32  
33  
34  
35  
36  
37  
38  
39  
40  
41  
42  
43  
44  
45  
46  
47  
48  
49  
50  
51  
52  
53  
54  
55  
56  
57  
58  
59  
60

32. Wensing M, Jung HP, Mainz J, Olesen F, Grol R. A systematic review of the literature on patient priorities for general practice care. Part 1: Description of the research domain. *Soc Sci Med*. 1998;47(10):1573-88.
33. Crow R, Gage H, Hampson S, Hart J, Kimber A, Storey L, Thomas H. The measurement of satisfaction with healthcare: implications for practice from a systematic review of the literature. *Health Techn Ass*. 2002;6(32).
34. Bensing JM, Brink-Muinen A van den, Boerma W, Dulmen S van. The manifestation of job satisfaction in doctor-patient communication; a ten-country European study. *Int J Pers Cent Med*. 2013;3:44-52.
35. Zantinge EM, Verhaak PFM, De Bakker DH, Van Der Meer K, Bensing JM. Does burnout among doctors affect their involvement in patients' mental health problems? A study of videotaped consultations. *BMC Fam Pract*. 2009;10:1-10.
36. Anagnostopoulos F, Liolios E, Persefonis G, Slater J, Kafetsios K, Niakas D. Physician burnout and patient satisfaction with consultation in primary health care settings: Evidence of relationships from a one-with-many design. *J Clin Psychol Med Settings*. 2012;19:401-10.
37. Orton P, Orton C, Gray DP. Depersonalised doctors: A cross-sectional study of 564 doctors, 760 consultations and 1876 patient reports in UK general practice. *BMJ Open*. 2012;2:1-8.
38. Ožvačić Adžić Z, Katić M, Kern J, Soler JK, Cerovečki V, Polašek O. Is Burnout in Family Physicians in Croatia Related to Interpersonal Quality of Care? *Arch Ind Hyg Toxicol*. 2013;64:255-64.
39. Ratanawongsa N, Roter D, Beach MC, Laird SL, Larson SM, Carson KA, et al. Physician burnout and patient-physician communication during primary care encounters. *J Gen Intern Med*. 2008;23:1581-8.
40. Pedersen AF, Carlsen AH, Vedsted P. Association of GPs' risk attitudes, level of empathy, and burnout status with PSA testing in primary care. *Br J Gen Pract*. 2015;65:e845-51.
41. Linzer M, Manwell LB, Williams ES, Bobula JA, Brown RL, Varkey AB, Man B, McMurray JE, Maquire A, Horner-Ibler B, Schwarz MD. Working conditions in primary care: Physician reactions and care quality. *Ann Intern Med*. 2009;151(1):28-36.
42. Maslach C, Leiter MP, Schaufeli W. Measuring Burnout. *Oxford Handb Organ Well Being*. 2009;86-108.
43. Bakker AB, Demerouti E, Sanz-Vergel AI. Burnout and work engagement: The JD-R Approach. *Annu Rev Organ Psychol Organ Behav*. 2014;1:389-411.
44. Rao M, Clarke A, Sanderson C, Hammersley R. Patients' own assessments of quality of primary care compared with objective records based measures of technical quality of care: Cross sectional study. *Br Med J* 2006;333:19-22.

**STROBE 2007 (v4) Statement—Checklist of items that should be included in reports of *cohort studies***

| Section/Topic                | Item # | Recommendation                                                                                                                                                                       | Reported on page # |
|------------------------------|--------|--------------------------------------------------------------------------------------------------------------------------------------------------------------------------------------|--------------------|
| <b>Title and abstract</b>    | 1      | (a) Indicate the study's design with a commonly used term in the title or the abstract                                                                                               | 1                  |
|                              |        | (b) Provide in the abstract an informative and balanced summary of what was done and what was found                                                                                  | 2-3                |
| <b>Introduction</b>          |        |                                                                                                                                                                                      |                    |
| Background/rationale         | 2      | Explain the scientific background and rationale for the investigation being reported                                                                                                 | 4                  |
| Objectives                   | 3      | State specific objectives, including any prespecified hypotheses                                                                                                                     | 4                  |
| <b>Methods</b>               |        |                                                                                                                                                                                      |                    |
| Study design                 | 4      | Present key elements of study design early in the paper                                                                                                                              | 5-6                |
| Setting                      | 5      | Describe the setting, locations, and relevant dates, including periods of recruitment, exposure, follow-up, and data collection                                                      | 5                  |
| Participants                 | 6      | (a) Give the eligibility criteria, and the sources and methods of selection of participants. Describe methods of follow-up                                                           | 5, 7               |
|                              |        | (b) For matched studies, give matching criteria and number of exposed and unexposed                                                                                                  | -                  |
| Variables                    | 7      | Clearly define all outcomes, exposures, predictors, potential confounders, and effect modifiers. Give diagnostic criteria, if applicable                                             | 5-8                |
| Data sources/<br>measurement | 8*     | For each variable of interest, give sources of data and details of methods of assessment (measurement). Describe comparability of assessment methods if there is more than one group | 5-8                |
| Bias                         | 9      | Describe any efforts to address potential sources of bias                                                                                                                            | 5-8                |
| Study size                   | 10     | Explain how the study size was arrived at                                                                                                                                            | 5                  |
| Quantitative variables       | 11     | Explain how quantitative variables were handled in the analyses. If applicable, describe which groupings were chosen and why                                                         | 6-7                |
| Statistical methods          | 12     | (a) Describe all statistical methods, including those used to control for confounding                                                                                                | 8                  |
|                              |        | (b) Describe any methods used to examine subgroups and interactions                                                                                                                  | 8                  |
|                              |        | (c) Explain how missing data were addressed                                                                                                                                          | 7                  |
|                              |        | (d) If applicable, explain how loss to follow-up was addressed                                                                                                                       | -                  |
|                              |        | (e) Describe any sensitivity analyses                                                                                                                                                | -                  |
| <b>Results</b>               |        |                                                                                                                                                                                      |                    |



|                          |     |                                                                                                                                                                                                                                                                                                                                                                                                               |                                               |
|--------------------------|-----|---------------------------------------------------------------------------------------------------------------------------------------------------------------------------------------------------------------------------------------------------------------------------------------------------------------------------------------------------------------------------------------------------------------|-----------------------------------------------|
| Participants             | 13* | (a) Report numbers of individuals at each stage of study—eg numbers potentially eligible, examined for eligibility, confirmed eligible, included in the study, completing follow-up, and analysed<br>(b) Give reasons for non-participation at each stage<br>(c) Consider use of a flow diagram                                                                                                               | 5<br>5-8<br>-                                 |
| Descriptive data         | 14* | (a) Give characteristics of study participants (eg demographic, clinical, social) and information on exposures and potential confounders<br>(b) Indicate number of participants with missing data for each variable of interest<br>(c) Summarise follow-up time (eg, average and total amount)                                                                                                                | 8-9<br>7-8<br>8                               |
| Outcome data             | 15* | Report numbers of outcome events or summary measures over time                                                                                                                                                                                                                                                                                                                                                | 8                                             |
| Main results             | 16  | (a) Give unadjusted estimates and, if applicable, confounder-adjusted estimates and their precision (eg, 95% confidence interval). Make clear which confounders were adjusted for and why they were included<br>(b) Report category boundaries when continuous variables were categorized<br>(c) If relevant, consider translating estimates of relative risk into absolute risk for a meaningful time period | 10-11 (table 3)<br>10 (table 2)<br>considered |
| Other analyses           | 17  | Report other analyses done—eg analyses of subgroups and interactions, and sensitivity analyses                                                                                                                                                                                                                                                                                                                | -                                             |
| <b>Discussion</b>        |     |                                                                                                                                                                                                                                                                                                                                                                                                               |                                               |
| Key results              | 18  | Summarise key results with reference to study objectives                                                                                                                                                                                                                                                                                                                                                      | 12                                            |
| <b>Limitations</b>       |     |                                                                                                                                                                                                                                                                                                                                                                                                               |                                               |
| Interpretation           | 20  | Give a cautious overall interpretation of results considering objectives, limitations, multiplicity of analyses, results from similar studies, and other relevant evidence                                                                                                                                                                                                                                    | 12-16                                         |
| Generalisability         | 21  | Discuss the generalisability (external validity) of the study results                                                                                                                                                                                                                                                                                                                                         | 16                                            |
| <b>Other information</b> |     |                                                                                                                                                                                                                                                                                                                                                                                                               |                                               |
| Funding                  | 22  | Give the source of funding and the role of the funders for the present study and, if applicable, for the original study on which the present article is based                                                                                                                                                                                                                                                 | 17                                            |

\*Give information separately for cases and controls in case-control studies and, if applicable, for exposed and unexposed groups in cohort and cross-sectional studies.

**Note:** An Explanation and Elaboration article discusses each checklist item and gives methodological background and published examples of transparent reporting. The STROBE checklist is best used in conjunction with this article (freely available on the Web sites of PLoS Medicine at <http://www.plosmedicine.org/>, Annals of Internal Medicine at <http://www.annals.org/>, and Epidemiology at <http://www.epidem.com/>). Information on the STROBE Initiative is available at [www.strobe-statement.org](http://www.strobe-statement.org).
